# Supplementary material
Source: PubMed Central journal article supplement (PMC11552088)
Supplement: NIHMS2033072-supplement-1.pdf [file NIHMS2033072-supplement-1.pdf]

## Supplementary Methods

### Validation of *H pylori* Test Results

We used VHA structured (laboratory tests) and unstructured (pathology reports) data to create algorithms to identify *H pylori* testing, including serologic and non-serologic laboratory testing (eg, fecal antigen) and based on gastric histopathology. We used manual chart review as the reference standard to verify the accuracy of the algorithms for identifying the following: date of testing; serologic vs non-serologic laboratory testing, and result classification of completed tests (positive vs negative). The a priori validation goal was to achieve a one-sided 95% confidence lower bound for positive predictive value and negative predictive value >90%. Each algorithm underwent iterative modifications if these a priori thresholds were not achieved. For each validation round, a set of unique individuals who were categorized as algorithm positive (n = 100) or negative (n = 100) were randomly selected, and the charts were manually reviewed to categorize each individual as true vs false positive or negative. The reviewer, an experienced gastroenterologist (SCS), was blinded to the algorithm-generated results to avoid bias. Performance characteristics for each algorithm were assessed after each round.

The algorithm for discriminating serologic vs non-serologic (urea breath, fecal antigen, rapid urease, and CLO tests) laboratory testing (structured data) achieved a positive predictive value of 99% (95% lower bound,

94.6%) for the test type. The algorithm categorizing laboratory testing results as positive vs negative (structured data) achieved a positive predictive value of 99% (95% lower bound, 94.6%) and negative predictive value of 100% (95% lower bound, 96.4%), assuming approximately 26% prevalence of *H pylori* infection. The estimated sensitivity and specificity of the algorithm identifying *H pylori* test results were 100% and 99.6%, respectively.

For *H pylori* infection assessed via endoscopically obtained gastric biopsies, we narrowed the eligible documents by first selecting pathology reports dated  $\pm 30$  days from a completed EGD procedure where gastric biopsies were obtained. EGD procedures were identified on the basis of Current Procedural Terminology codes. We used the unstructured data extracted from these pathology reports and performed 5 rounds of iterative modifications using a stepwise approach, with each round informed by a manual review of more than 200 pathology reports from distinct patients (100–120 infected and 100–120 non-infected patients using the medical record as the reference standard); the reviewer (SCS) was again blinded to the algorithm-generated results to avoid bias. After the fifth development and validation round, the estimated negative predictive value achieved 97.9% (95% lower bound, 93.9%) and positive predictive value 95.0% (95% lower bound, 90%) for the diagnosis of *H pylori* positive vs negative based on histology, respectively. The estimated sensitivity and specificity of the algorithm identifying *H pylori* infection based on histopathology were 100% and 99.6%, respectively.

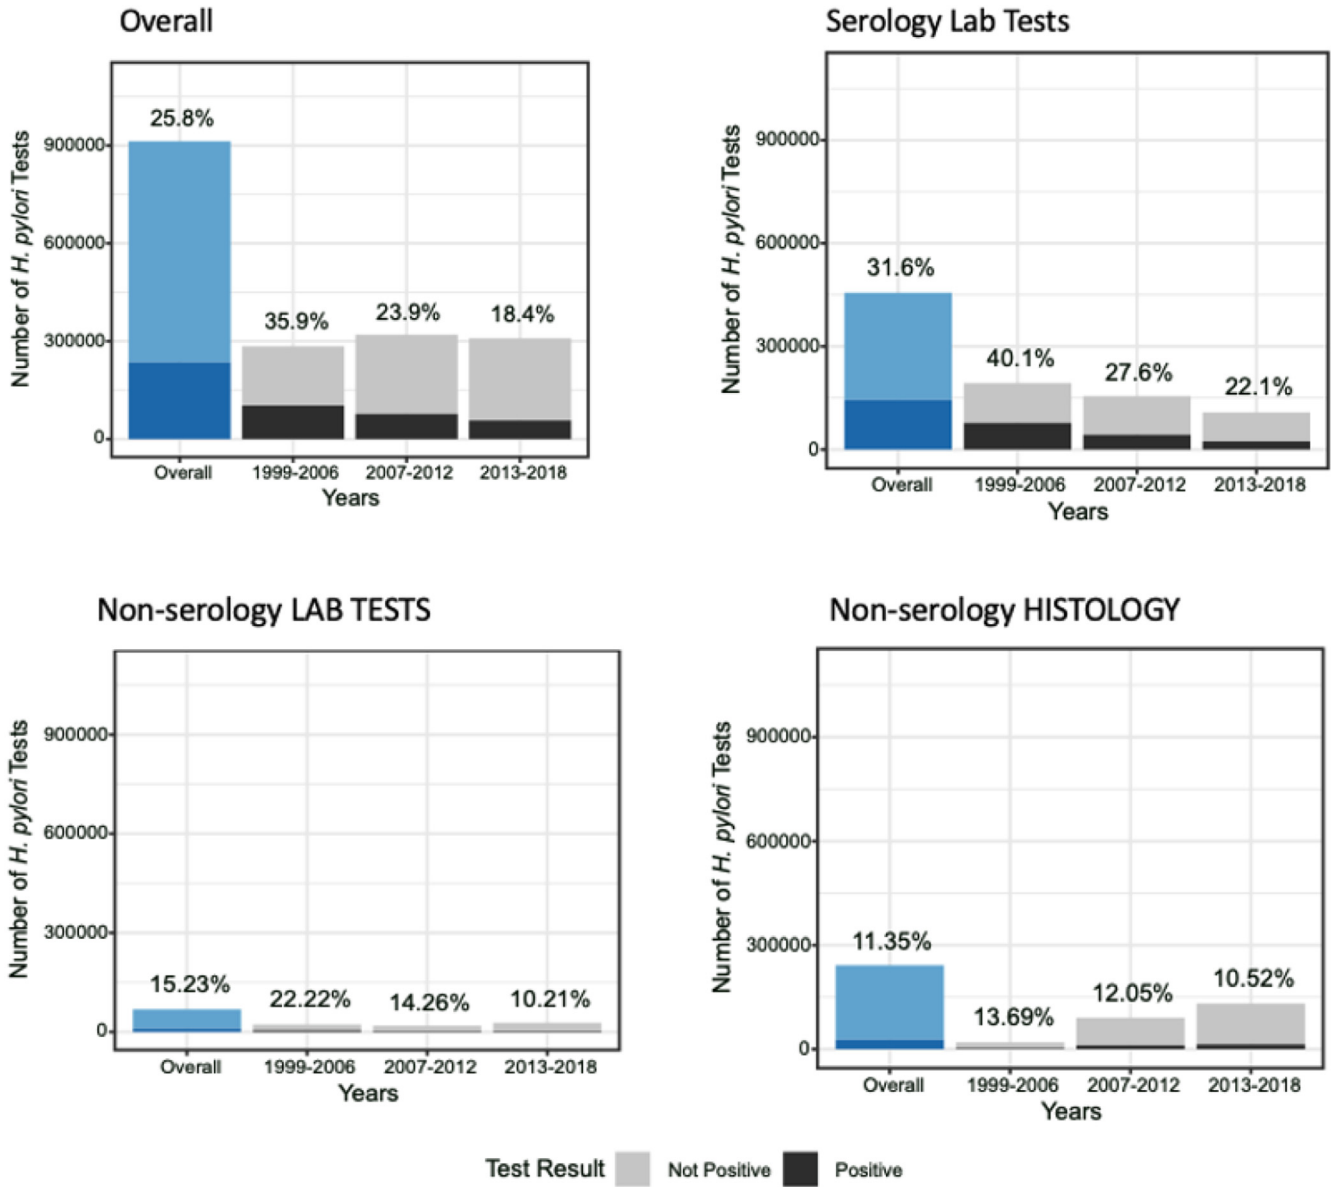

**Supplementary Figure 1.** *H. pylori* test results stratified by overall (total testing irrespective of test type), serology, non-serology lab tests (not including histology), and histology, 1999–2006, 2007–2012, and 2013–2018. Test types in these histograms (except the Overall category) are mutually exclusive, meaning that individuals who had more than one test type are excluded. This applies only to this histogram and not to other analyses. It should also be noted that the timing of *H. pylori* eradication treatment is not considered in this analysis.

**A. 1999-2006**

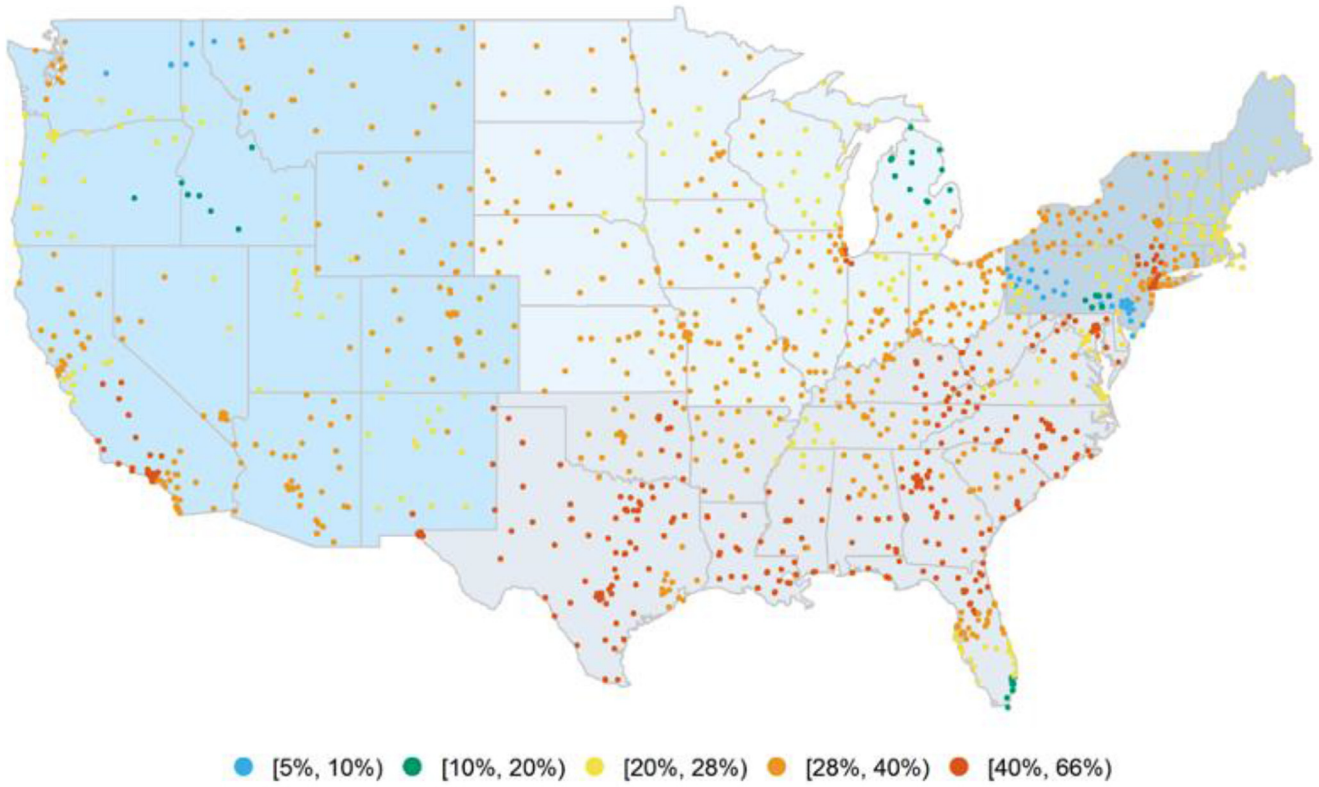

**B. 2007-2012**

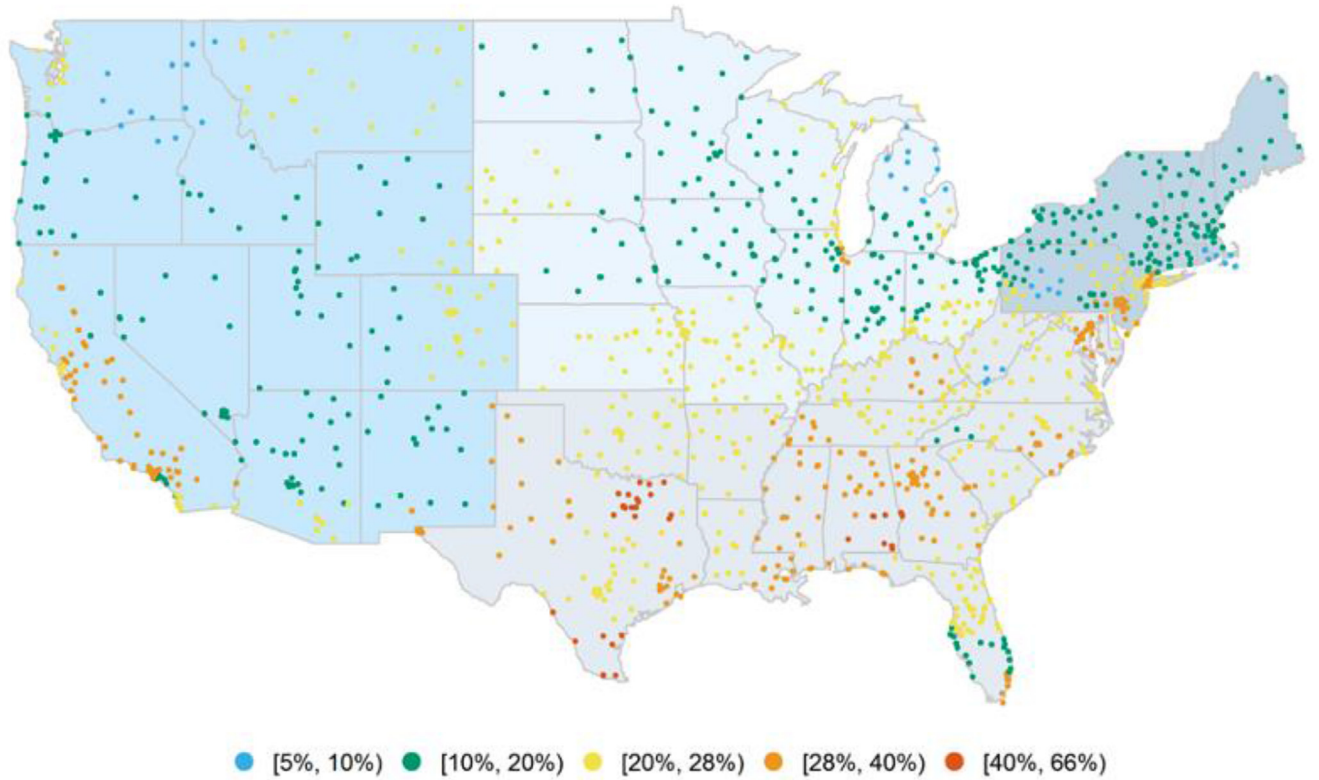

**Supplementary Figure 2.** Geographic distribution of *H. pylori* positivity overall in the United States stratified by time interval. (A) 1999–2006, (B) 2007–2012, and (C) 2013–2018.

C. 2013-2018

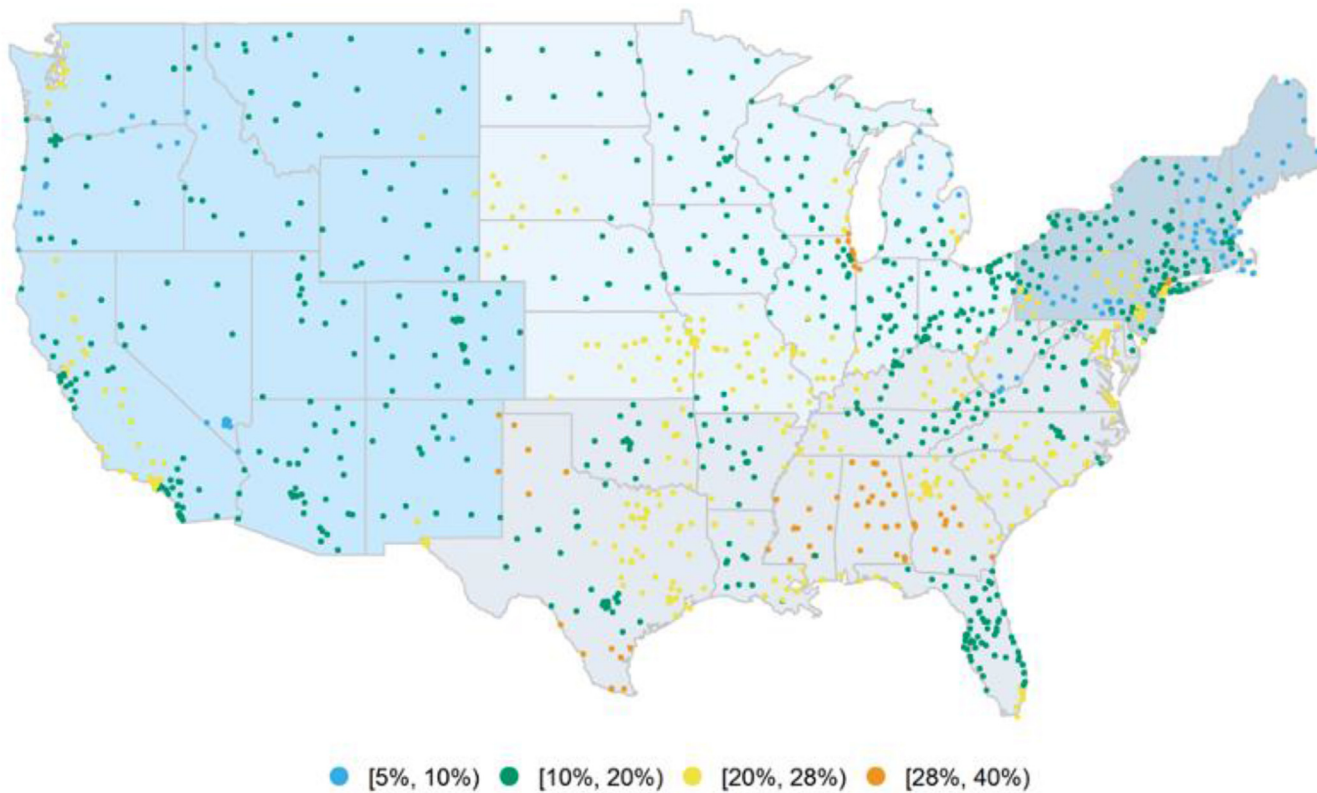

Supplementary Figure 2. (continued).

A. 1999-2006

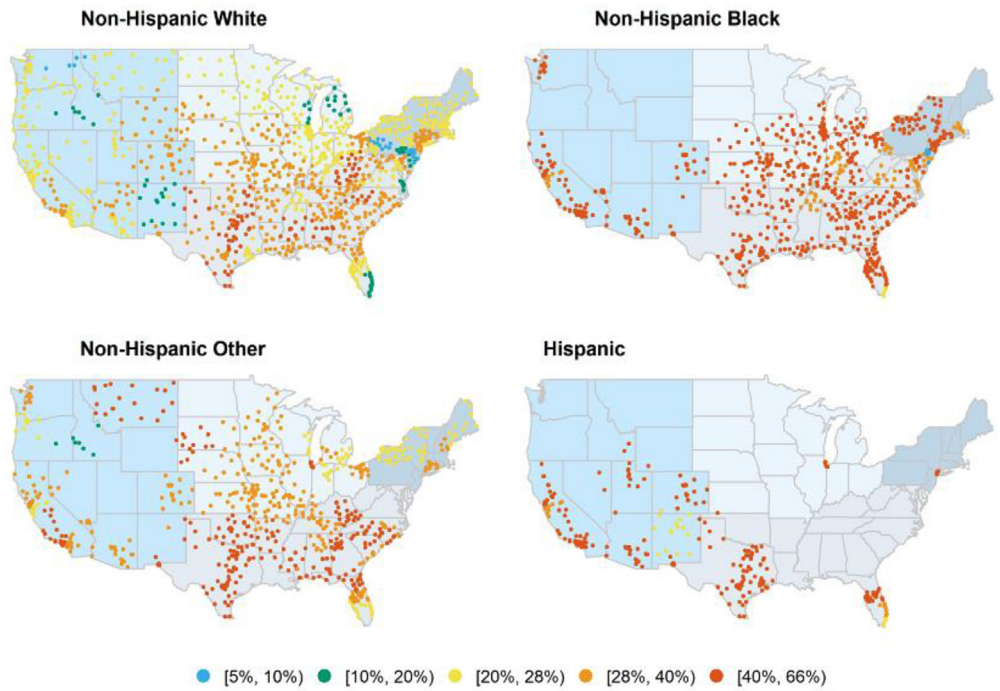

B. 2007-2012

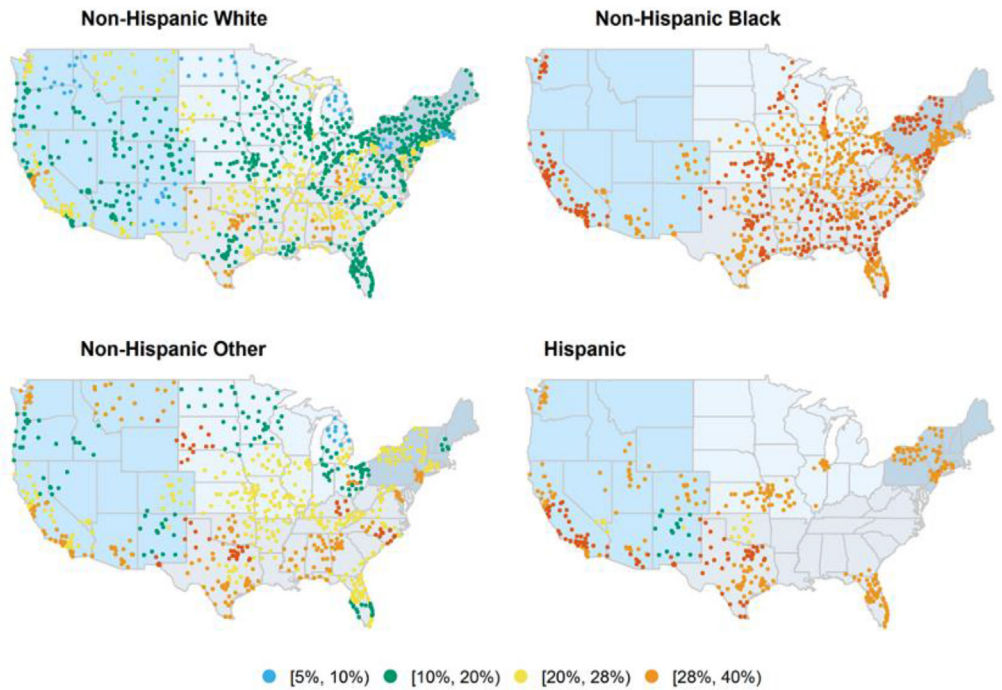

**Supplementary Figure 3.** Geographic distribution of *H pylori* positivity overall in the United States according to race and ethnicity stratified by time interval. (A) 1999–2006, (B) 2007–2012, and (C) 2013–2018.

C. 2013-2018

Non-Hispanic White

Non-Hispanic Black

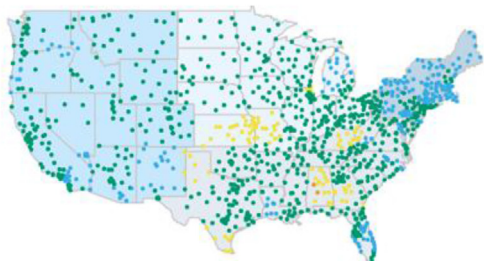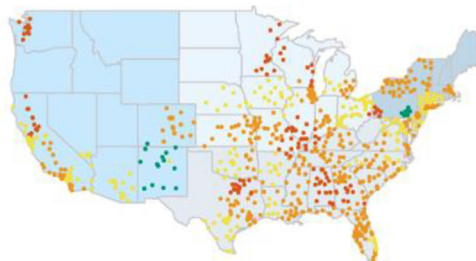

Non-Hispanic Other

Hispanic

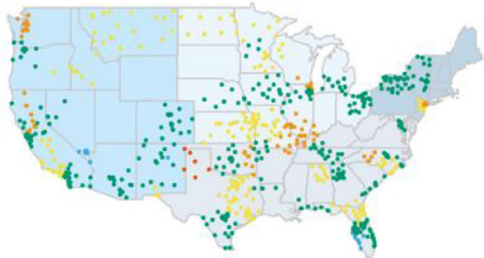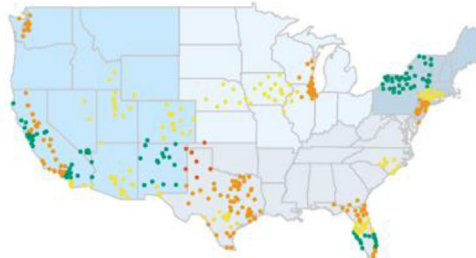

● [5%, 10%) ● [10%, 20%) ● [20%, 28%) ● [28%, 40%)

**Supplementary Figure 3.**  
*(continued).*

**A. 1999-2018**

Age < 60 years

Age >= 60 years

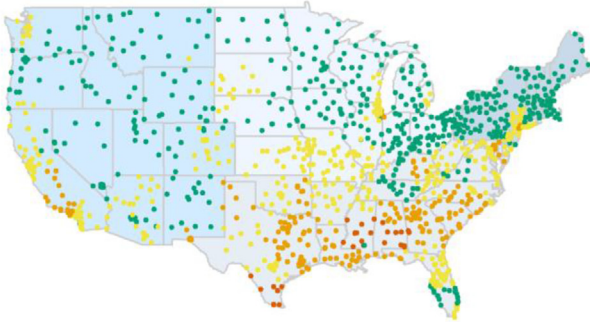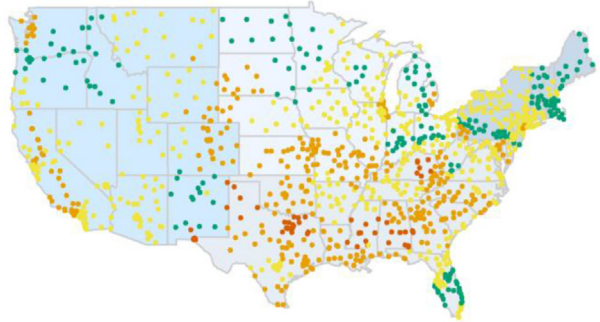

● [10%,20%) ● [20%, 28%) ● [28%, 40%) ● [40%, 66%)

**B. 1999-2006**

Age < 60 years

Age >= 60 years

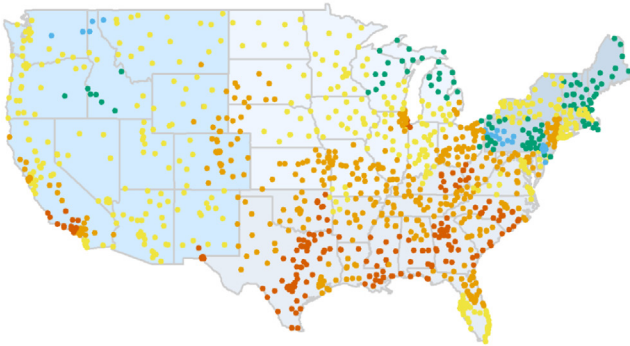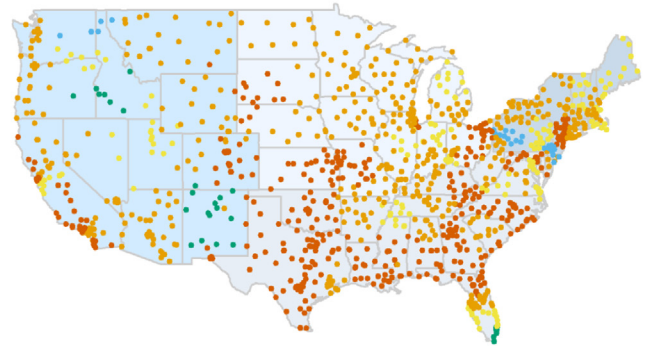

● [5%, 10%) ● [10%, 20%) ● [20%, 28%) ● [28%, 40%) ● [40%, 66%)

**Supplementary Figure 4.** Geographic distribution of *H. pylori* positivity in the United States based on age group. (A) 1999–2018, (B) 1999–2006, (C) 2007–2012, and (D) 2013–2018.

**C. 2007-2012**

**Age < 60 years**

**Age >= 60 years**

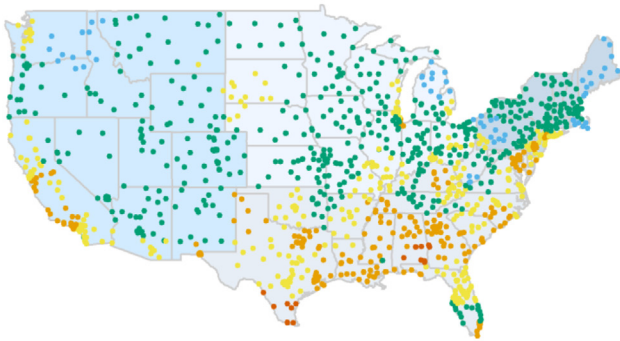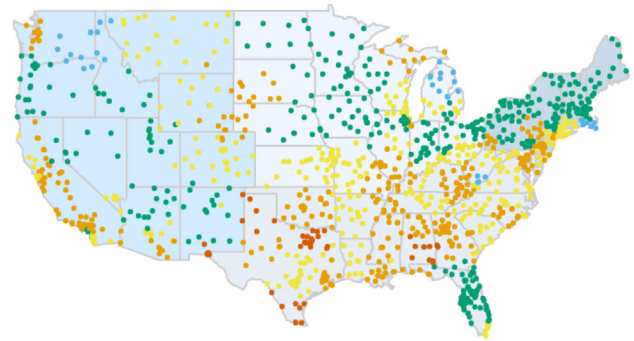

● [5%, 10%) ● [10%, 20%) ● [20%, 28%) ● [28%, 40%) ● [40%, 66%)

**D. 2013-2018**

**Age < 60 years**

**Age >= 60 years**

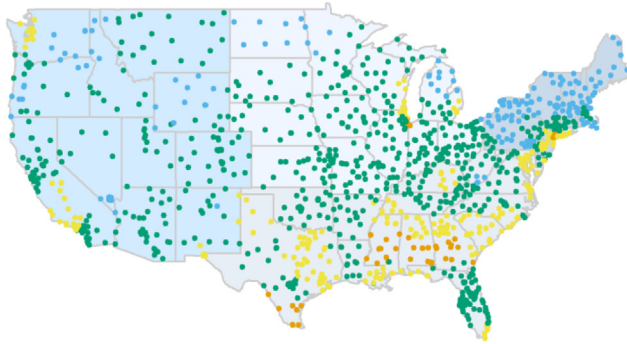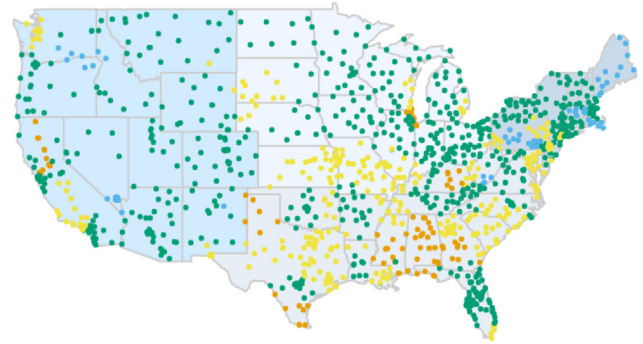

● [5%, 10%) ● [10%, 20%) ● [20%, 28%) ● [28%, 40%)

**Supplementary Figure 4. (continued).**



**A. 1999-2018**

**Male**

**Female**

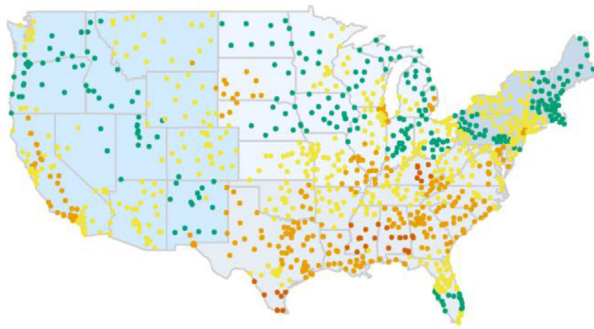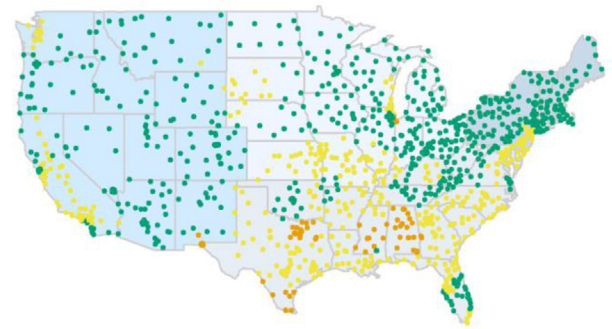

● [10%,20%) ● [20%, 28%) ● [28%, 40%) ● [40%, 66%)

**B. 1999-2006**

**Male**

**Female**

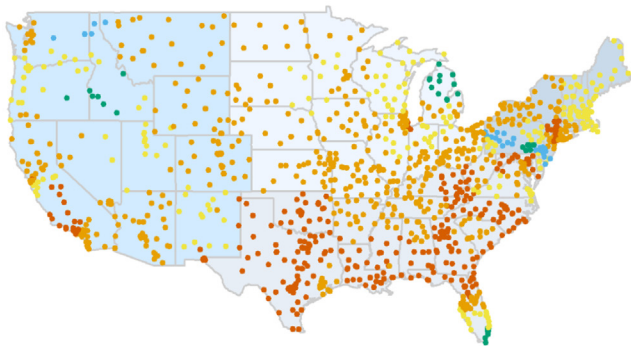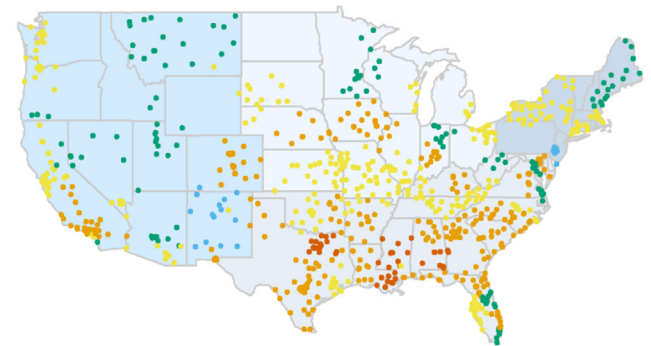

● [5%, 10%) ● [10%, 20%) ● [20%, 28%) ● [28%, 40%) ● [40%, 66%)

**Supplementary Figure 5.** Geographic distribution of *H. pylori* positivity in the United States based on sex. (A) 1999–2018, (B) 1999–2006, (C) 2007–2012, and (D) 2013–2018.

C. 2007-2012

Male

Female

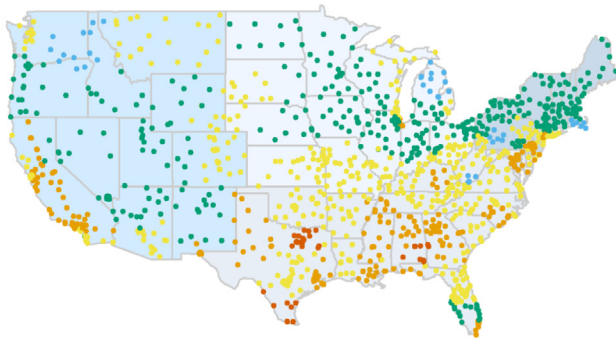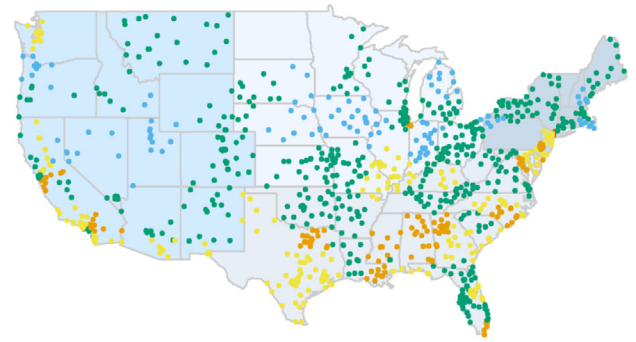

● [5%, 10%) ● [10%, 20%) ● [20%, 28%) ● [28%, 40%) ● [40%, 66%)

D. 2013-2018

Male

Female

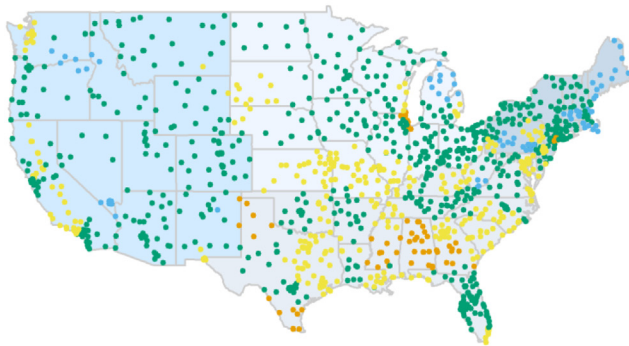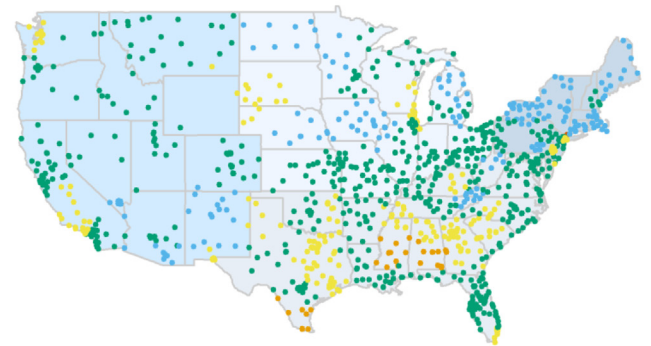

● [5%, 10%) ● [10%, 20%) ● [20%, 28%) ● [28%, 40%)

Supplementary Figure 5. (continued).

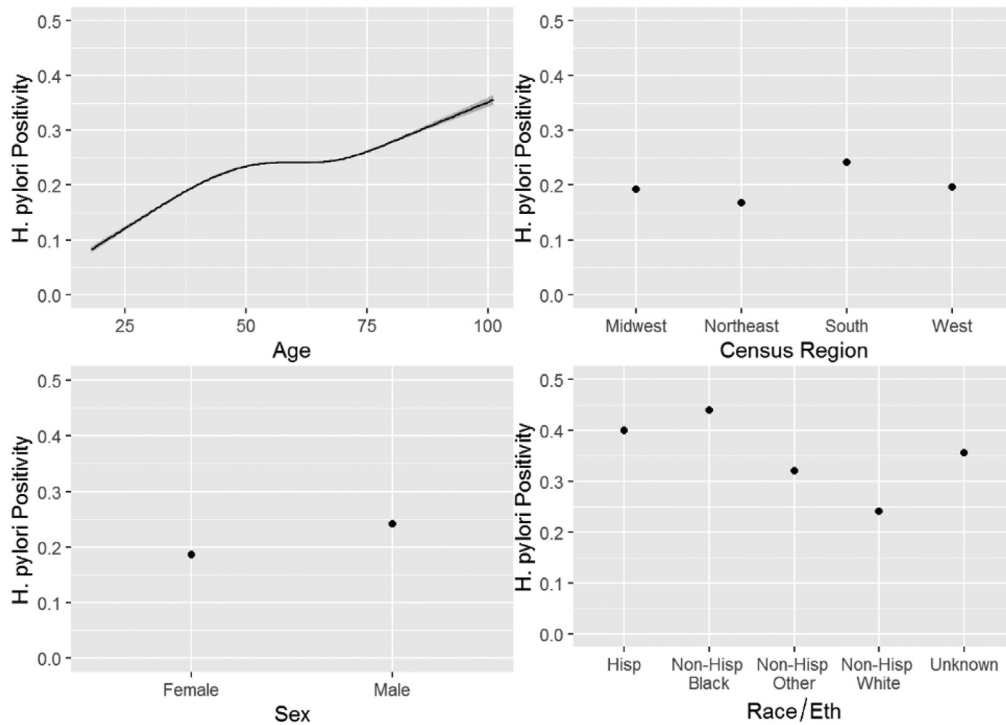

**Supplementary Figure 6.** The plots below represent the results of the ordinary least squares regression model used to estimate the variation in *H pylori* positivity attributable to specific demographic factors, namely geography, race and ethnicity, age, and sex, over the time period 1999–2018 (*H pylori* positivity, 25.8%). Each of these factors individually was significantly associated with *H pylori* positivity ( $P < .001$ ). Approximately 4.67% of the variance in *H pylori* positivity was explained by these specific demographic factors when evaluating the overall 1999–2018 time period, with race and ethnicity accounting for the majority of this variance (3.51%). The pattern was overall unchanged when evaluating separate time intervals, although notably more pronounced between 2007 and 2012, where race and ethnicity accounted for 4.53% of the 5.35% demographic model variance of *H pylori* positivity (Supplementary Table 6).

**Supplementary Table 1. *H pylori* Positivity and Population Demographics by VHA Station Location, Full Cohort 1999–2018**

| VHA station location                      | Patients included (N) | <i>H pylori</i> positivity (95% CI) | Age, full cohort (y)<br>Median (95% CI) | Sex, % total cohort (95% CI) |                        | Race and ethnicity, % total cohort (95% CI) |                        |                        |                        |
|-------------------------------------------|-----------------------|-------------------------------------|-----------------------------------------|------------------------------|------------------------|---------------------------------------------|------------------------|------------------------|------------------------|
|                                           |                       |                                     |                                         | Female                       | Male                   | Non-Hispanic white                          | Non-Hispanic black     | Non-Hispanic other     | Hispanic               |
| <b>Alabama</b>                            |                       |                                     |                                         |                              |                        |                                             |                        |                        |                        |
| Central Alabama HCS (Montgomery, AL)      | 8479                  | 48.3%<br>(47.3%–49.4%)              | 54.8 (54.5–55.1)                        | 11.9%<br>(11.2%–12.6%)       | 88.1%<br>(87.4%–88.8%) | 39.1%<br>(38.1%–40.1%)                      | 49.6%<br>(48.5%–50.7%) | 10.4%<br>(9.7%–11%)    | 0.9%<br>(0.8%–1.2%)    |
| Birmingham, AL                            | 8060                  | 32.7%<br>(31.7%–33.7%)              | 57.3 (57–57.6)                          | 10.6%<br>(10%–11.3%)         | 89.4%<br>(88.7%–90%)   | 55.2%<br>(54.1%–56.3%)                      | 34%<br>(33%–35.1%)     | 10.1%<br>(9.4%–10.7%)  | 0.7%<br>(0.5%–0.9%)    |
| Tuscaloosa, AL                            | 2520                  | 45.2%<br>(43.2%–47.2%)              | 55 (54.5–55.6)                          | 12.2%<br>(11%–13.6%)         | 87.8%<br>(86.4%–89%)   | 46.5%<br>(44.5%–48.5%)                      | 36.2%<br>(34.3%–38.1%) | 16.8%<br>(15.4%–18.3%) | 0.5%<br>(0.3%–0.9%)    |
| <b>Alaska</b>                             |                       |                                     |                                         |                              |                        |                                             |                        |                        |                        |
| Alaska VAHSRO (Anchorage, AK)             | 1702                  | 23.8%<br>(21.8%–25.9%)              | 52.4 (51.8–53.1)                        | 12.7%<br>(11.2%–14.4%)       | 87.3%<br>(85.6%–88.8%) | 69.9%<br>(67.6%–72%)                        | 10.6%<br>(9.2%–12.2%)  | 16.6%<br>(14.8%–18.4%) | 2.9%<br>(2.2%–3.9%)    |
| <b>Arizona</b>                            |                       |                                     |                                         |                              |                        |                                             |                        |                        |                        |
| Phoenix, AZ                               | 10,991                | 20.2%<br>(19.5%–21%)                | 56.3 (56–56.6)                          | 10%<br>(9.5%–10.6%)          | 90%<br>(89.4%–90.5%)   | 66.3%<br>(65.4%–67.1%)                      | 8.1%<br>(7.6%–8.7%)    | 15.7%<br>(15%–16.4%)   | 9.9%<br>(9.4%–10.5%)   |
| Southern Arizona HCS (Tucson, AZ)         | 8800                  | 24.3%<br>(23.4%–25.2%)              | 59.7 (59.3–60)                          | 11.6%<br>(10.9%–12.3%)       | 88.4%<br>(87.7%–89.1%) | 66.7%<br>(65.7%–67.6%)                      | 5.1%<br>(4.7%–5.6%)    | 14.5%<br>(13.7%–15.2%) | 13.8%<br>(13.1%–14.5%) |
| Northern Arizona HCS (Prescott, AZ)       | 2657                  | 22%<br>(20.5%–23.7%)                | 59.6 (59.1–60.2)                        | 8.6%<br>(7.6%–9.8%)          | 91.4%<br>(90.2%–92.4%) | 79.6%<br>(78%–81.1%)                        | 1.2%<br>(0.9%–1.8%)    | 15.8%<br>(14.5%–17.3%) | 3.3%<br>(2.7%–4.1%)    |
| <b>Arkansas</b>                           |                       |                                     |                                         |                              |                        |                                             |                        |                        |                        |
| Central Arkansas HCS (Little Rock, AR)    | 13,556                | 26.5%<br>(25.7%–27.2%)              | 59.1 (58.8–59.3)                        | 8.3%<br>(7.9%–8.8%)          | 91.7%<br>(91.2%–92.1%) | 70%<br>(69.3%–70.8%)                        | 20.9%<br>(20.3%–21.6%) | 8.4%<br>(8%–8.9%)      | 0.6%<br>(0.5%–0.7%)    |
| Fayetteville, AR                          | 10,351                | 22.8%<br>(22%–23.6%)                | 58.9 (58.6–59.2)                        | 7.6%<br>(7.1%–8.2%)          | 92.4%<br>(91.8%–92.9%) | 88.9%<br>(88.3%–89.5%)                      | 1.5%<br>(1.3%–1.8%)    | 8.7%<br>(8.2%–9.3%)    | 0.9%<br>(0.7%–1.1%)    |
| <b>California</b>                         |                       |                                     |                                         |                              |                        |                                             |                        |                        |                        |
| Greater Los Angeles HCS (Los Angeles, CA) | 11,761                | 36%<br>(35.1%–36.9%)                | 57 (56.7–57.3)                          | 8.3%<br>(7.9%–8.9%)          | 91.7%<br>(91.1%–92.1%) | 41.1%<br>(40.2%–42%)                        | 25.7%<br>(24.9%–26.5%) | 17.5%<br>(16.8%–18.2%) | 15.7%<br>(15%–16.4%)   |
| Northern California HCS (Martinez, CA)    | 11,102                | 29.3%<br>(28.4%–30.1%)              | 56.8 (56.5–57.1)                        | 15.8%<br>(15.2%–16.5%)       | 84.2%<br>(83.5%–84.8%) | 54.2%<br>(53.3%–55.1%)                      | 15.3%<br>(14.6%–16%)   | 25.7%<br>(24.9%–26.5%) | 4.8%<br>(4.4%–5.3%)    |
| Loma Linda, CA                            | 10,746                | 22.3%<br>(21.5%–23.1%)              | 57.6 (57.3–57.9)                        | 9.5%<br>(9%–10.1%)           | 90.5%<br>(89.9%–91%)   | 55%<br>(54.1%–55.9%)                        | 12.6%<br>(12%–13.3%)   | 15.4%<br>(14.7%–16.1%) | 17%<br>(16.3%–17.7%)   |
| San Diego HCS (San Diego, CA)             | 9546                  | 21.8%<br>(21%–22.6%)                | 53.8 (53.4–54.1)                        | 12.1%<br>(11.5%–12.8%)       | 87.9%<br>(87.2%–88.5%) | 55.4%<br>(54.4%–56.4%)                      | 14.5%<br>(13.8%–15.2%) | 15.1%<br>(14.4%–15.9%) | 15%<br>(14.3%–15.7%)   |
| Palo Alto HCS (Palo Alto, CA)             | 8438                  | 26.5%<br>(25.5%–27.4%)              | 60.5 (60.2–60.9)                        | 9%<br>(8.4%–9.7%)            | 91%<br>(90.3%–91.6%)   | 59.6%<br>(58.6%–60.7%)                      | 9.4%<br>(8.8%–10.1%)   | 18%<br>(17.2%–18.8%)   | 13%<br>(12.3%–13.7%)   |
| Long Beach HCS (Long Beach, CA)           | 7795                  | 21.8%<br>(20.9%–22.8%)              | 57.4 (57–57.7)                          | 8.9%<br>(8.3%–9.6%)          | 91.1%<br>(90.4%–91.7%) | 45.4%<br>(44.3%–46.5%)                      | 12.7%<br>(11.9%–13.4%) | 25.6%<br>(24.6%–26.6%) | 16.3%<br>(15.5%–17.2%) |
| San Francisco, CA                         | 7297                  | 24.1%<br>(23.1%–25.1%)              | 60.5 (60.2–60.8)                        | 7.2%<br>(6.7%–7.9%)          | 92.8%<br>(92.1%–93.3%) | 54.3%<br>(53.1%–55.4%)                      | 11.5%<br>(10.8%–12.3%) | 28.7%<br>(27.6%–29.7%) | 5.6%<br>(5%–6.1%)      |
| Central California HCS (Fresno, CA)       | 6441                  | 31.4%<br>(30.3%–32.6%)              | 59.4 (59.1–59.8)                        | 6.5%<br>(6%–7.2%)            | 93.5%<br>(92.8%–94%)   | 53.6%<br>(52.3%–54.8%)                      | 6.7%<br>(6.1%–7.4%)    | 19.7%<br>(18.8%–20.7%) | 20%<br>(19%–21%)       |
| <b>Colorado</b>                           |                       |                                     |                                         |                              |                        |                                             |                        |                        |                        |
| Eastern Colorado HCS (Denver, CO)         | 11,307                | 24.7%<br>(23.9%–25.5%)              | 54.5 (54.2–54.8)                        | 10.4%<br>(9.9%–11%)          | 89.6%<br>(89%–90.1%)   | 62.5%<br>(61.6%–63.4%)                      | 10.1%<br>(9.6%–10.7%)  | 12.5%<br>(11.9%–13.2%) | 14.9%<br>(14.2%–15.5%) |

Supplementary Table 1. Continued

| VHA station location                               | Patients included (N) | <i>H pylori</i> positivity (95% CI) | Age, full cohort (y)<br>Median (95% CI) | Sex, % total cohort (95% CI) |                        | Race and ethnicity, % total cohort (95% CI) |                        |                        |                        |
|----------------------------------------------------|-----------------------|-------------------------------------|-----------------------------------------|------------------------------|------------------------|---------------------------------------------|------------------------|------------------------|------------------------|
|                                                    |                       |                                     |                                         | Female                       | Male                   | Non-Hispanic white                          | Non-Hispanic black     | Non-Hispanic other     | Hispanic               |
| Grand Junction, CO                                 | 1531                  | 19.6%<br>(17.7%–21.7%)              | 59 (58.2–59.8)                          | 12.9%<br>(11.3%–14.7%)       | 87.1%<br>(85.3%–88.7%) | 84.7%<br>(82.8%–86.5%)                      | 0.7%<br>(0.3%–1.2%)    | 9.8%<br>(8.4%–11.4%)   | 4.8%<br>(3.8%–6.1%)    |
| Connecticut<br>Connecticut HCS (West Haven, CT)    | 8057                  | 20.7%<br>(19.8%–21.6%)              | 60.6 (60.3–60.9)                        | 7.1%<br>(6.5%–7.6%)          | 92.9%<br>(92.4%–93.5%) | 70.1%<br>(69.1%–71.1%)                      | 12.5%<br>(11.8%–13.3%) | 12.4%<br>(11.7%–13.1%) | 4.9%<br>(4.5%–5.4%)    |
| Delaware<br>Wilmington, DE                         | 4779                  | 22.2%<br>(21%–23.4%)                | 59.6 (59.2–60)                          | 9%<br>(8.2%–9.9%)            | 91%<br>(90.1%–91.8%)   | 60%<br>(58.6%–61.4%)                        | 25.4%<br>(24.2%–26.6%) | 12.3%<br>(11.4%–13.2%) | 2.4%<br>(2%–2.8%)      |
| Florida<br>Tampa, FL                               | 20,184                | 22.8%<br>(22.2%–23.4%)              | 60.1 (59.9–60.3)                        | 11.6%<br>(11.1%–12%)         | 88.4%<br>(88%–88.9%)   | 67.3%<br>(66.6%–67.9%)                      | 11.7%<br>(11.2%–12.1%) | 13%<br>(12.5%–13.5%)   | 8.1%<br>(7.7%–8.5%)    |
| N. Florida/S. Georgia HCS<br>(Gainesville, FL)     | 19,487                | 25.7%<br>(25.1%–26.3%)              | 59.1 (58.9–59.3)                        | 12%<br>(11.6%–12.5%)         | 88%<br>(87.5%–88.4%)   | 66.7%<br>(66.1%–67.4%)                      | 18.9%<br>(18.4%–19.5%) | 11.7%<br>(11.2%–12.1%) | 2.7%<br>(2.5%–2.9%)    |
| West Palm Beach, FL                                | 12,621                | 16.7%<br>(16.1%–17.4%)              | 62.1 (61.8–62.3)                        | 9.2%<br>(8.7%–9.7%)          | 90.8%<br>(90.3%–91.3%) | 75%<br>(74.2%–75.7%)                        | 11.9%<br>(11.4%–12.5%) | 8.4%<br>(7.9%–8.9%)    | 4.8%<br>(4.4%–5.2%)    |
| Orlando, FL                                        | 10,836                | 20%<br>(19.2%–20.7%)                | 55.1 (54.9–55.4)                        | 13.2%<br>(12.5%–13.8%)       | 86.8%<br>(86.2%–87.5%) | 60.7%<br>(59.7%–61.6%)                      | 14.5%<br>(13.9%–15.2%) | 9.9%<br>(9.4%–10.5%)   | 14.9%<br>(14.3%–15.6%) |
| Bay Pines, FL                                      | 8083                  | 16.5%<br>(15.7%–17.3%)              | 59.8 (59.5–60.1)                        | 10.7%<br>(10%–11.4%)         | 89.3%<br>(88.6%–90%)   | 74.9%<br>(74%–75.9%)                        | 7.9%<br>(7.3%–8.5%)    | 13.8%<br>(13.1%–14.6%) | 3.3%<br>(3%–3.8%)      |
| Miami, FL                                          | 7310                  | 25.6%<br>(24.6%–26.6%)              | 54.8 (54.5–55.2)                        | 11.9%<br>(11.2%–12.7%)       | 88.1%<br>(87.3%–88.8%) | 40.4%<br>(39.3%–41.5%)                      | 29.2%<br>(28.1%–30.2%) | 6.6%<br>(6.1%–7.2%)    | 23.8%<br>(22.8%–24.8%) |
| Georgia<br>Atlanta, GA                             | 11,110                | 31.4%<br>(30.5%–32.3%)              | 56.1 (55.9–56.4)                        | 13.1%<br>(12.5%–13.7%)       | 86.9%<br>(86.3%–87.5%) | 39.8%<br>(38.9%–40.7%)                      | 45.7%<br>(44.8%–46.6%) | 12.9%<br>(12.3%–13.6%) | 1.5%<br>(1.3%–1.8%)    |
| Augusta, GA                                        | 7230                  | 30.1%<br>(29.1%–31.2%)              | 57.2 (56.8–57.5)                        | 12.9%<br>(12.1%–13.7%)       | 87.1%<br>(86.3%–87.9%) | 51.7%<br>(50.6%–52.9%)                      | 38.7%<br>(37.6%–39.8%) | 7.7%<br>(7.1%–8.3%)    | 1.9%<br>(1.6%–2.2%)    |
| Dublin, GA                                         | 4655                  | 34.9%<br>(33.5%–36.3%)              | 56.5 (56.1–56.8)                        | 9.5%<br>(8.7%–10.4%)         | 90.5%<br>(89.6%–91.3%) | 47.8%<br>(46.3%–49.2%)                      | 40.8%<br>(39.4%–42.2%) | 10.5%<br>(9.7%–11.5%)  | 0.9%<br>(0.7%–1.2%)    |
| Hawaii<br>VA Pacific Islands HCS<br>(Honolulu, HI) | 1445                  | 19.6%<br>(17.6%–21.7%)              | 54.4 (53.7–55.2)                        | 10.2%<br>(8.8%–11.9%)        | 89.8%<br>(88.1%–91.2%) | 37.2%<br>(34.7%–39.8%)                      | 9.4%<br>(8%–11.1%)     | 47.2%<br>(44.6%–49.8%) | 6.2%<br>(5%–7.6%)      |
| Idaho<br>Boise, ID                                 | 5092                  | 14.5%<br>(13.5%–15.5%)              | 58.5 (58.1–59)                          | 8.4%<br>(7.7%–9.2%)          | 91.6%<br>(90.8%–92.3%) | 70.9%<br>(69.6%–72.2%)                      | 0.9%<br>(0.7%–1.2%)    | 25.9%<br>(24.7%–27.1%) | 2.3%<br>(1.9%–2.8%)    |
| Illinois<br>Hines, IL                              | 9142                  | 20.5%<br>(19.6%–21.3%)              | 61.1 (60.8–61.4)                        | 6.7%<br>(6.2%–7.3%)          | 93.3%<br>(92.7%–93.8%) | 68.6%<br>(67.7%–69.6%)                      | 18.5%<br>(17.7%–19.3%) | 8.1%<br>(7.5%–8.6%)    | 4.8%<br>(4.4%–5.3%)    |
| Chicago (Westside), IL                             | 7195                  | 38.7%<br>(37.6%–39.9%)              | 59.9 (59.5–60.2)                        | 8%<br>(7.4%–8.7%)            | 92%<br>(91.3%–92.6%)   | 24.3%<br>(23.3%–25.3%)                      | 58.6%<br>(57.5%–59.8%) | 10%<br>(9.3%–10.7%)    | 7.1%<br>(6.5%–7.7%)    |
| North Chicago, IL                                  | 4580                  | 26.8%<br>(25.5%–28.1%)              | 49.3 (48.8–49.9)                        | 26.4%<br>(25.2%–27.7%)       | 73.6%<br>(72.3%–74.8%) | 62.7%<br>(61.3%–64.1%)                      | 19%<br>(17.8%–20.1%)   | 11.2%<br>(10.3%–12.1%) | 7.2%<br>(6.4%–8%)      |

Supplementary Table 1. Continued

| VHA station location              | Patients included (N) | <i>H pylori</i> positivity (95% CI) | Age, full cohort (y)<br>Median (95% CI) | Sex, % total cohort (95% CI) |                        | Race and ethnicity, % total cohort (95% CI) |                        |                        |                     |
|-----------------------------------|-----------------------|-------------------------------------|-----------------------------------------|------------------------------|------------------------|---------------------------------------------|------------------------|------------------------|---------------------|
|                                   |                       |                                     |                                         | Female                       | Male                   | Non-Hispanic white                          | Non-Hispanic black     | Non-Hispanic other     | Hispanic            |
| Illiana HCS (Danville, IL)        | 3902                  | 19.8%<br>(18.5%–21.1%)              | 58.8 (58.3–59.2)                        | 7.4%<br>(6.6%–8.2%)          | 92.6%<br>(91.8%–93.4%) | 80.5%<br>(79.2%–81.7%)                      | 7.2%<br>(6.4%–8.1%)    | 11.6%<br>(10.6%–12.7%) | 0.7%<br>(0.5%–1%)   |
| Indiana                           |                       |                                     |                                         |                              |                        |                                             |                        |                        |                     |
| Indianapolis, IN                  | 10,497                | 19%<br>(18.3%–19.8%)                | 58.9 (58.6–59.2)                        | 10.1%<br>(9.5%–10.7%)        | 89.9%<br>(89.3%–90.5%) | 69.6%<br>(68.8%–70.5%)                      | 15.6%<br>(14.9%–16.3%) | 13.9%<br>(13.2%–14.6%) | 0.8%<br>(0.7%–1%)   |
| Northern Indiana HCS (Marion, IN) | 5255                  | 19.5%<br>(18.4%–20.6%)              | 59.9 (59.5–60.3)                        | 5.9%<br>(5.3%–6.6%)          | 94.1%<br>(93.4%–94.7%) | 79.6%<br>(78.5%–80.7%)                      | 7.1%<br>(6.4%–7.8%)    | 12%<br>(11.1%–12.9%)   | 1.3%<br>(1%–1.7%)   |
| Kentucky                          |                       |                                     |                                         |                              |                        |                                             |                        |                        |                     |
| Lexington, KY                     | 12,530                | 39.8%<br>(39%–40.7%)                | 59.4 (59.2–59.7)                        | 6.2%<br>(5.8%–6.7%)          | 93.8%<br>(93.3%–94.2%) | 85.8%<br>(85.2%–86.4%)                      | 5.7%<br>(5.3%–6.1%)    | 8.1%<br>(7.6%–8.6%)    | 0.4%<br>(0.3%–0.6%) |
| Louisville, KY                    | 6155                  | 20.8%<br>(19.8%–21.8%)              | 59 (58.7–59.4)                          | 9.2%<br>(8.5%–10%)           | 90.8%<br>(90%–91.5%)   | 79.5%<br>(78.4%–80.5%)                      | 16.3%<br>(15.4%–17.3%) | 3.3%<br>(2.9%–3.8%)    | 0.9%<br>(0.7%–1.2%) |
| Louisiana                         |                       |                                     |                                         |                              |                        |                                             |                        |                        |                     |
| Shreveport, LA                    | 8522                  | 28.9%<br>(28%–29.9%)                | 58.7 (58.4–59)                          | 9.5%<br>(8.9%–10.1%)         | 90.5%<br>(89.9%–91.1%) | 56.5%<br>(55.5%–57.6%)                      | 31.6%<br>(30.6%–32.6%) | 11.2%<br>(10.5%–11.9%) | 0.8%<br>(0.6%–1%)   |
| New Orleans, LA                   | 5126                  | 33.6%<br>(32.3%–34.9%)              | 56 (55.7–56.4)                          | 10.7%<br>(9.9%–11.6%)        | 89.3%<br>(88.4%–90.1%) | 42.3%<br>(40.9%–43.7%)                      | 51.8%<br>(50.4%–53.2%) | 4.6%<br>(4%–5.2%)      | 1.3%<br>(1.1%–1.7%) |
| Alexandria, LA                    | 4261                  | 29.1%<br>(27.8%–30.5%)              | 58.4 (58–58.8)                          | 11.4%<br>(10.4%–12.4%)       | 88.6%<br>(87.6%–89.6%) | 58.9%<br>(57.4%–60.4%)                      | 28.9%<br>(27.6%–30.3%) | 11.5%<br>(10.6%–12.6%) | 0.6%<br>(0.4%–0.9%) |
| Maine                             |                       |                                     |                                         |                              |                        |                                             |                        |                        |                     |
| Togus, ME                         | 6185                  | 14.9%<br>(14%–15.8%)                | 59.3 (58.9–59.6)                        | 7.5%<br>(6.8%–8.1%)          | 92.5%<br>(91.9%–93.2%) | 87.4%<br>(86.6%–88.2%)                      | 0.7%<br>(0.5%–1%)      | 11.3%<br>(10.5%–12.1%) | 0.6%<br>(0.4%–0.8%) |
| Maryland                          |                       |                                     |                                         |                              |                        |                                             |                        |                        |                     |
| Maryland HCS (Baltimore, MD)      | 6872                  | 32.1%<br>(31%–33.2%)                | 58.7 (58.4–59)                          | 12%<br>(11.3%–12.8%)         | 88%<br>(87.2%–88.7%)   | 42.9%<br>(41.7%–44.1%)                      | 46.1%<br>(44.9%–47.3%) | 9.8%<br>(9.1%–10.5%)   | 1.2%<br>(1%–1.5%)   |
| Massachusetts                     |                       |                                     |                                         |                              |                        |                                             |                        |                        |                     |
| Boston HCS (Boston, MA)           | 5647                  | 17.5%<br>(16.5%–18.5%)              | 61.5 (61.1–61.9)                        | 8.3%<br>(7.6%–9.1%)          | 91.7%<br>(90.9%–92.4%) | 78.3%<br>(77.2%–79.4%)                      | 8.8%<br>(8.1%–9.6%)    | 10%<br>(9.2%–10.8%)    | 2.9%<br>(2.5%–3.4%) |
| Northampton, MA                   | 2078                  | 16.5%<br>(14.9%–18.2%)              | 56.5 (55.8–57.2)                        | 7.8%<br>(6.7%–9.1%)          | 92.2%<br>(90.9%–93.3%) | 77.4%<br>(75.5%–79.2%)                      | 8.2%<br>(7.1%–9.5%)    | 9.2%<br>(8%–10.5%)     | 5.2%<br>(4.3%–6.3%) |
| Bedford, MA                       | 1244                  | 16%<br>(14%–18.2%)                  | 56.4 (55.5–57.3)                        | 6.5%<br>(5.2%–8.1%)          | 93.5%<br>(91.9%–94.8%) | 76.4%<br>(73.9%–78.7%)                      | 4.6%<br>(3.5%–5.9%)    | 15.9%<br>(14%–18.1%)   | 3.1%<br>(2.3%–4.3%) |
| Michigan                          |                       |                                     |                                         |                              |                        |                                             |                        |                        |                     |
| Detroit, MI                       | 7464                  | 28.5%<br>(27.5%–29.5%)              | 58.7 (58.4–59)                          | 7.4%<br>(6.8%–8%)            | 92.6%<br>(92%–93.2%)   | 45.4%<br>(44.2%–46.5%)                      | 44.3%<br>(43.1%–45.4%) | 9.1%<br>(8.4%–9.8%)    | 1.3%<br>(1.1%–1.6%) |
| Battle Creek, MI                  | 6121                  | 20.2%<br>(19.2%–21.2%)              | 55.8 (55.4–56.2)                        | 7.8%<br>(7.1%–8.5%)          | 92.2%<br>(91.5%–92.9%) | 76.9%<br>(75.8%–77.9%)                      | 11.7%<br>(10.9%–12.6%) | 9.5%<br>(8.8%–10.2%)   | 1.9%<br>(1.6%–2.3%) |
| Ann Arbor, MI                     | 5056                  | 17.7%<br>(16.7%–18.8%)              | 58.5 (58.1–58.9)                        | 7%<br>(6.3%–7.7%)            | 93%<br>(92.3%–93.7%)   | 67.2%<br>(65.9%–68.5%)                      | 8%<br>(7.3%–8.8%)      | 23.2%<br>(22%–24.4%)   | 1.6%<br>(1.3%–2%)   |
| Saginaw, MI                       | 4650                  | 9.7%<br>(8.8%–10.5%)                | 56.9 (56.4–57.3)                        | 6.7%<br>(6%–7.4%)            | 93.3%<br>(92.6%–94%)   | 84.5%<br>(83.4%–85.5%)                      | 4%<br>(3.5%–4.7%)      | 9.7%<br>(8.9%–10.6%)   | 1.7%<br>(1.4%–2.2%) |

Supplementary Table 1. Continued

| VHA station location                | Patients included (N) | <i>H pylori</i> positivity (95% CI) | Age, full cohort (y)<br>Median (95% CI) | Sex, % total cohort (95% CI) |                        | Race and ethnicity, % total cohort (95% CI) |                        |                        |                        |
|-------------------------------------|-----------------------|-------------------------------------|-----------------------------------------|------------------------------|------------------------|---------------------------------------------|------------------------|------------------------|------------------------|
|                                     |                       |                                     |                                         | Female                       | Male                   | Non-Hispanic white                          | Non-Hispanic black     | Non-Hispanic other     | Hispanic               |
| Iron Mountain, MI                   | 2629                  | 19.1%<br>(17.6%–20.7%)              | 60.5 (60–61.1)                          | 7%<br>(6.1%–8.1%)            | 93%<br>(91.9%–93.9%)   | 95%<br>(94.1%–95.8%)                        | 0.2%<br>(0.1%–0.5%)    | 4.1%<br>(3.4%–5%)      | 0.7%<br>(0.4%–1.1%)    |
| Minnesota                           |                       |                                     |                                         |                              |                        |                                             |                        |                        |                        |
| Minneapolis, MN (CACHE 5.0)         | 9927                  | 19.8%<br>(19%–20.6%)                | 59.6 (59.3–60)                          | 6.6%<br>(6.2%–7.2%)          | 93.4%<br>(92.8%–93.8%) | 78.8%<br>(78%–79.6%)                        | 4.4%<br>(4%–4.8%)      | 15.4%<br>(14.7%–16.1%) | 1.5%<br>(1.2%–1.7%)    |
| St. Cloud, MN (CACHE 5.0)           | 3907                  | 18.2%<br>(17%–19.4%)                | 60.1 (59.6–60.6)                        | 7.3%<br>(6.5%–8.1%)          | 92.7%<br>(91.9%–93.5%) | 81%<br>(79.7%–82.2%)                        | 2.1%<br>(1.7%–2.6%)    | 16.5%<br>(15.4%–17.7%) | 0.4%<br>(0.3%–0.7%)    |
| Mississippi                         |                       |                                     |                                         |                              |                        |                                             |                        |                        |                        |
| Jackson, MS                         | 15,758                | 44.8%<br>(44%–45.6%)                | 58.9 (58.6–59.1)                        | 8.6%<br>(8.2%–9.1%)          | 91.4%<br>(90.9%–91.8%) | 49.1%<br>(48.3%–49.9%)                      | 38.8%<br>(38%–39.5%)   | 10.8%<br>(10.3%–11.3%) | 1.4%<br>(1.2%–1.6%)    |
| Biloxi, MS                          | 9125                  | 33.3%<br>(32.4%–34.3%)              | 56.1 (55.9–56.4)                        | 13.1%<br>(12.4%–13.8%)       | 86.9%<br>(86.2%–87.6%) | 64.2%<br>(63.2%–65.2%)                      | 19.9%<br>(19.1%–20.7%) | 14.4%<br>(13.7%–15.2%) | 1.4%<br>(1.2%–1.7%)    |
| Missouri                            |                       |                                     |                                         |                              |                        |                                             |                        |                        |                        |
| VA Heartland East (Saint Louis, MO) | 18,071                | 27.8%<br>(27.2%–28.5%)              | 59.1 (58.9–59.3)                        | 8.8%<br>(8.4%–9.2%)          | 91.2%<br>(90.8%–91.6%) | 74%<br>(73.4%–74.7%)                        | 15.9%<br>(15.4%–16.4%) | 9.3%<br>(8.9%–9.8%)    | 0.7%<br>(0.6%–0.9%)    |
| VA Heartland West (Kansas City, MO) | 10,227                | 26.4%<br>(25.6%–27.3%)              | 58.2 (58–58.5)                          | 10.5%<br>(9.9%–11.1%)        | 89.5%<br>(88.9%–90.1%) | 81.2%<br>(80.4%–82%)                        | 8.8%<br>(8.2%–9.3%)    | 7.7%<br>(7.2%–8.3%)    | 2.3%<br>(2%–2.6%)      |
| Montana                             |                       |                                     |                                         |                              |                        |                                             |                        |                        |                        |
| Montana HCS (Fort Harrison, MT)     | 8271                  | 23.1%<br>(22.2%–24%)                | 57.9 (57.6–58.3)                        | 8.3%<br>(7.7%–9%)            | 91.7%<br>(91%–92.3%)   | 86.7%<br>(85.9%–87.4%)                      | 0.4%<br>(0.3%–0.6%)    | 11.8%<br>(11.1%–12.5%) | 1.1%<br>(0.9%–1.3%)    |
| Nebraska                            |                       |                                     |                                         |                              |                        |                                             |                        |                        |                        |
| Central Plains HCS (Omaha, NE)      | 16,602                | 19.1%<br>(18.5%–19.7%)              | 59.8 (59.6–60)                          | 7.6%<br>(7.2%–8%)            | 92.4%<br>(92%–92.8%)   | 85%<br>(84.4%–85.5%)                        | 4.5%<br>(4.2%–4.8%)    | 8.9%<br>(8.5%–9.4%)    | 1.6%<br>(1.4%–1.8%)    |
| Nevada                              |                       |                                     |                                         |                              |                        |                                             |                        |                        |                        |
| Southern Nevada HCS (Las Vegas, NV) | 7499                  | 19.4%<br>(18.5%–20.3%)              | 57.3 (57–57.7)                          | 10.6%<br>(9.9%–11.3%)        | 89.4%<br>(88.7%–90.1%) | 58.8%<br>(57.7%–60%)                        | 14.8%<br>(14%–15.6%)   | 20.5%<br>(19.6%–21.4%) | 5.9%<br>(5.4%–6.5%)    |
| Sierra Nevada HCS (Reno, NV)        | 6060                  | 19.6%<br>(18.6%–20.6%)              | 61.1 (60.7–61.4)                        | 7.5%<br>(6.8%–8.2%)          | 92.5%<br>(91.8%–93.2%) | 81.3%<br>(80.3%–82.3%)                      | 2.3%<br>(1.9%–2.7%)    | 13%<br>(12.1%–13.8%)   | 3.4%<br>(3%–3.9%)      |
| New Hampshire                       |                       |                                     |                                         |                              |                        |                                             |                        |                        |                        |
| Manchester, NH                      | 4574                  | 17.3%<br>(16.2%–18.5%)              | 59 (58.6–59.4)                          | 8.2%<br>(7.5%–9.1%)          | 91.8%<br>(90.9%–92.5%) | 81.1%<br>(80%–82.3%)                        | 1.2%<br>(0.9%–1.6%)    | 17.1%<br>(16%–18.2%)   | 0.6%<br>(0.4%–0.9%)    |
| New Jersey                          |                       |                                     |                                         |                              |                        |                                             |                        |                        |                        |
| New Jersey HCS (East Orange, NJ)    | 5684                  | 23.9%<br>(22.8%–25%)                | 59.3 (58.9–59.7)                        | 8.6%<br>(7.8%–9.3%)          | 91.4%<br>(90.7%–92.2%) | 53.7%<br>(52.4%–55%)                        | 29%<br>(27.8%–30.2%)   | 9.3%<br>(8.5%–10.1%)   | 8.1%<br>(7.4%–8.9%)    |
| New Mexico                          |                       |                                     |                                         |                              |                        |                                             |                        |                        |                        |
| New Mexico HCS (Albuquerque, NM)    | 5954                  | 13.5%<br>(12.7%–14.4%)              | 58.4 (58–58.7)                          | 13.8%<br>(12.9%–14.7%)       | 86.2%<br>(85.3%–87.1%) | 42.3%<br>(41%–43.6%)                        | 3.5%<br>(3.1%–4.1%)    | 26.4%<br>(25.3%–27.5%) | 27.8%<br>(26.6%–28.9%) |

Supplementary Table 1. Continued

| VHA station location                           | Patients included (N) | <i>H pylori</i> positivity (95% CI) | Age, full cohort (y)<br>Median (95% CI) | Sex, % total cohort (95% CI) |                        | Race and ethnicity, % total cohort (95% CI) |                        |                        |                        |
|------------------------------------------------|-----------------------|-------------------------------------|-----------------------------------------|------------------------------|------------------------|---------------------------------------------|------------------------|------------------------|------------------------|
|                                                |                       |                                     |                                         | Female                       | Male                   | Non-Hispanic white                          | Non-Hispanic black     | Non-Hispanic other     | Hispanic               |
| <b>New York</b>                                |                       |                                     |                                         |                              |                        |                                             |                        |                        |                        |
| Upstate New York HCS NY                        | 21,577                | 20.5%<br>(19.9%–21%)                | 59.3 (59.1–59.6)                        | 10.3%<br>(9.9%–10.7%)        | 89.7%<br>(89.3%–90.1%) | 79.6%<br>(79.1%–80.1%)                      | 8.5%<br>(8.2%–8.9%)    | 10.3%<br>(9.9%–10.7%)  | 1.5%<br>(1.4%–1.7%)    |
| Hudson Valley HCS (Castle Point, Montrose, NY) | 3507                  | 22.4%<br>(21.1%–23.9%)              | 61.6 (61.1–62.1)                        | 5.9%<br>(5.1%–6.7%)          | 94.1%<br>(93.3%–94.9%) | 73.4%<br>(71.9%–74.8%)                      | 14.8%<br>(13.6%–16%)   | 5.5%<br>(4.8%–6.3%)    | 6.4%<br>(5.6%–7.2%)    |
| Bronx, NY                                      | 2648                  | 40%<br>(38.1%–41.9%)                | 57.9 (57.3–58.6)                        | 12.8%<br>(11.6%–14.1%)       | 87.2%<br>(85.9%–88.4%) | 23.4%<br>(21.8%–25.1%)                      | 38.8%<br>(36.9%–40.7%) | 10%<br>(8.9%–11.2%)    | 27.8%<br>(26.1%–29.6%) |
| New York HHS (Brooklyn, NY)                    | 2462                  | 31.8%<br>(30%–33.7%)                | 56.7 (56–57.4)                          | 11.5%<br>(10.3%–12.8%)       | 88.5%<br>(87.2%–89.7%) | 32.4%<br>(30.6%–34.3%)                      | 36.7%<br>(34.8%–38.7%) | 12.7%<br>(11.4%–14.1%) | 18.2%<br>(16.7%–19.8%) |
| Northport, NY                                  | 2280                  | 23.8%<br>(22%–25.6%)                | 60 (59.3–60.7)                          | 8.2%<br>(7.1%–9.4%)          | 91.8%<br>(90.6%–92.9%) | 73.7%<br>(71.9%–75.5%)                      | 12.9%<br>(11.5%–14.3%) | 6.2%<br>(5.2%–7.3%)    | 7.2%<br>(6.2%–8.4%)    |
| <b>North Carolina</b>                          |                       |                                     |                                         |                              |                        |                                             |                        |                        |                        |
| Salisbury, NC                                  | 12,778                | 29.2%<br>(28.4%–30%)                | 57.5 (57.3–57.7)                        | 9.3%<br>(8.8%–9.8%)          | 90.7%<br>(90.2%–91.2%) | 64%<br>(63.1%–64.8%)                        | 28.6%<br>(27.8%–29.4%) | 6.3%<br>(5.9%–6.8%)    | 1.1%<br>(0.9%–1.3%)    |
| Durham, NC                                     | 8400                  | 26.2%<br>(25.3%–27.1%)              | 58.1 (57.8–58.4)                        | 10.7%<br>(10%–11.4%)         | 89.3%<br>(88.6%–90%)   | 53.5%<br>(52.4%–54.6%)                      | 38.8%<br>(37.7%–39.8%) | 6.4%<br>(5.9%–6.9%)    | 1.3%<br>(1.1%–1.6%)    |
| Fayetteville, NC                               | 7721                  | 34.2%<br>(33.2%–35.3%)              | 54.5 (54.2–54.8)                        | 13.8%<br>(13%–14.6%)         | 86.2%<br>(85.4%–87%)   | 48.2%<br>(47%–49.3%)                        | 41.5%<br>(40.4%–42.6%) | 7.5%<br>(6.9%–8.1%)    | 2.9%<br>(2.5%–3.3%)    |
| Asheville, NC                                  | 5649                  | 27.2%<br>(26%–28.3%)                | 60.8 (60.5–61.2)                        | 10.7%<br>(9.9%–11.5%)        | 89.3%<br>(88.5%–90.1%) | 89.1%<br>(88.3%–89.9%)                      | 5.7%<br>(5.2%–6.4%)    | 4.6%<br>(4%–5.2%)      | 0.6%<br>(0.4%–0.8%)    |
| <b>North Dakota</b>                            |                       |                                     |                                         |                              |                        |                                             |                        |                        |                        |
| Fargo, ND (CACHE 5.0)                          | 3534                  | 15.4%<br>(14.2%–16.6%)              | 61 (60.6–61.5)                          | 6.7%<br>(5.9%–7.6%)          | 93.3%<br>(92.4%–94.1%) | 86.7%<br>(85.5%–87.8%)                      | 1%<br>(0.7%–1.4%)      | 11.3%<br>(10.3%–12.4%) | 1%<br>(0.7%–1.5%)      |
| <b>Ohio</b>                                    |                       |                                     |                                         |                              |                        |                                             |                        |                        |                        |
| Cleveland, OH                                  | 13,162                | 21.5%<br>(20.8%–22.3%)              | 59.2 (59–59.5)                          | 7.9%<br>(7.4%–8.4%)          | 92.1%<br>(91.6%–92.6%) | 69.9%<br>(69.1%–70.7%)                      | 20.4%<br>(19.7%–21.1%) | 8.5%<br>(8%–9%)        | 1.2%<br>(1.1%–1.4%)    |
| Cincinnati, OH                                 | 4669                  | 19.7%<br>(18.6%–20.9%)              | 59.7 (59.3–60.1)                        | 6.4%<br>(5.8%–7.2%)          | 93.6%<br>(92.8%–94.2%) | 77.4%<br>(76.2%–78.6%)                      | 17.9%<br>(16.9%–19.1%) | 4.2%<br>(3.6%–4.8%)    | 0.4%<br>(0.3%–0.7%)    |
| Chillicothe, OH                                | 4437                  | 19.6%<br>(18.4%–20.8%)              | 59.2 (58.8–59.6)                        | 5.5%<br>(4.9%–6.3%)          | 94.5%<br>(93.7%–95.1%) | 87.9%<br>(86.9%–88.8%)                      | 2.5%<br>(2.1%–3%)      | 9.2%<br>(8.4%–10.1%)   | 0.4%<br>(0.2%–0.6%)    |
| Dayton, OH                                     | 3802                  | 19.7%<br>(18.5%–21%)                | 56.9 (56.4–57.3)                        | 10.7%<br>(9.7%–11.7%)        | 89.3%<br>(88.3%–90.3%) | 74.3%<br>(72.9%–75.7%)                      | 15.5%<br>(14.4%–16.7%) | 9.6%<br>(8.7%–10.6%)   | 0.6%<br>(0.4%–0.9%)    |
| Columbus, OH                                   | 3742                  | 17.6%<br>(16.4%–18.9%)              | 56.9 (56.4–57.4)                        | 10.8%<br>(9.8%–11.8%)        | 89.2%<br>(88.2%–90.2%) | 71.7%<br>(70.2%–73.1%)                      | 16.8%<br>(15.6%–18.1%) | 10.6%<br>(9.7%–11.7%)  | 0.9%<br>(0.6%–1.2%)    |
| <b>Oklahoma</b>                                |                       |                                     |                                         |                              |                        |                                             |                        |                        |                        |
| Oklahoma City, OK                              | 9099                  | 26.2%<br>(25.3%–27.2%)              | 56.9 (56.6–57.2)                        | 9.9%<br>(9.3%–10.5%)         | 90.1%<br>(89.5%–90.7%) | 71%<br>(70%–71.9%)                          | 14.4%<br>(13.7%–15.2%) | 12%<br>(11.3%–12.6%)   | 2.7%<br>(2.3%–3%)      |
| Muskogee, OK                                   | 7103                  | 33.3%<br>(32.2%–34.5%)              | 58 (57.7–58.4)                          | 11.5%<br>(10.7%–12.2%)       | 88.5%<br>(87.8%–89.3%) | 72.9%<br>(71.8%–73.9%)                      | 6.8%<br>(6.2%–7.4%)    | 19.1%<br>(18.2%–20.1%) | 1.2%<br>(1%–1.5%)      |
| <b>Oregon</b>                                  |                       |                                     |                                         |                              |                        |                                             |                        |                        |                        |
| Portland, OR (CACHE 5.0)                       | 8818                  | 17.8%<br>(17%–18.6%)                | 56.6 (56.3–56.9)                        | 10.5%<br>(9.8%–11.1%)        | 89.5%<br>(88.9%–90.2%) | 66.7%<br>(65.7%–67.7%)                      | 2.5%<br>(2.2%–2.8%)    | 28.7%<br>(27.7%–29.6%) | 2.1%<br>(1.8%–2.4%)    |



Supplementary Table 1. Continued

| VHA station location                         | Patients included (N) | <i>H pylori</i> positivity (95% CI) | Age, full cohort (y)<br>Median (95% CI) | Sex, % total cohort (95% CI) |                        | Race and ethnicity, % total cohort (95% CI) |                        |                        |                        |
|----------------------------------------------|-----------------------|-------------------------------------|-----------------------------------------|------------------------------|------------------------|---------------------------------------------|------------------------|------------------------|------------------------|
|                                              |                       |                                     |                                         | Female                       | Male                   | Non-Hispanic white                          | Non-Hispanic black     | Non-Hispanic other     | Hispanic               |
| Roseburg HCS (Roseburg, OR)                  | 3543                  | 18.4%<br>(17.2%–19.8%)              | 59 (58.5–59.5)                          | 7.6%<br>(6.7%–8.5%)          | 92.4%<br>(91.5%–93.3%) | 86.6%<br>(85.5%–87.7%)                      | 0.6%<br>(0.4%–0.9%)    | 10.6%<br>(9.7%–11.7%)  | 2.1%<br>(1.7%–2.7%)    |
| White City, OR (CACHE 5.0)                   | 2723                  | 22.5%<br>(20.9%–24.1%)              | 55.9 (55.4–56.4)                        | 8.1%<br>(7.1%–9.2%)          | 91.9%<br>(90.8%–92.9%) | 81.5%<br>(80%–82.9%)                        | 3.9%<br>(3.2%–4.7%)    | 12.6%<br>(11.3%–13.9%) | 2.1%<br>(1.6%–2.7%)    |
| Pennsylvania                                 |                       |                                     |                                         |                              |                        |                                             |                        |                        |                        |
| Philadelphia, PA                             | 6907                  | 22.1%<br>(21.1%–23.1%)              | 58 (57.7–58.4)                          | 10.2%<br>(9.5%–10.9%)        | 89.8%<br>(89.1%–90.5%) | 39.7%<br>(38.5%–40.9%)                      | 45.8%<br>(44.7%–47%)   | 10.7%<br>(9.9%–11.4%)  | 3.8%<br>(3.4%–4.3%)    |
| Lebanon, PA                                  | 3780                  | 13%<br>(11.9%–14.1%)                | 59 (58.6–59.5)                          | 9.3%<br>(8.4%–10.3%)         | 90.7%<br>(89.7%–91.6%) | 83.3%<br>(82%–84.4%)                        | 9%<br>(8.1%–9.9%)      | 4.2%<br>(3.6%–4.9%)    | 3.5%<br>(3%–4.2%)      |
| Erie, PA                                     | 3531                  | 15.6%<br>(14.5%–16.9%)              | 50.3 (49.7–50.9)                        | 8%<br>(7.1%–8.9%)            | 92%<br>(91.1%–92.9%)   | 90.2%<br>(89.2%–91.2%)                      | 2.9%<br>(2.4%–3.5%)    | 5.6%<br>(4.8%–6.4%)    | 1.3%<br>(1%–1.8%)      |
| Pittsburgh HCS (Pittsburgh, PA)              | 3418                  | 24%<br>(22.5%–25.4%)                | 56 (55.4–56.6)                          | 7.8%<br>(6.9%–8.7%)          | 92.2%<br>(91.3%–93.1%) | 75%<br>(73.5%–76.4%)                        | 13.3%<br>(12.2%–14.5%) | 10.9%<br>(9.8%–12%)    | 0.9%<br>(0.6%–1.3%)    |
| Wilkes-Barre, PA                             | 2670                  | 22.6%<br>(21%–24.2%)                | 59.7 (59.1–60.3)                        | 10.9%<br>(9.8%–12.2%)        | 89.1%<br>(87.8%–90.2%) | 79.8%<br>(78.2%–81.3%)                      | 4.3%<br>(3.5%–5.1%)    | 12.5%<br>(11.3%–13.9%) | 3.4%<br>(2.8%–4.2%)    |
| Altoona, PA                                  | 1915                  | 8.3%<br>(7.1%–9.7%)                 | 56.8 (56.1–57.5)                        | 7.9%<br>(6.8%–9.3%)          | 92.1%<br>(90.7%–93.2%) | 94.2%<br>(93%–95.1%)                        | 1.8%<br>(1.3%–2.5%)    | 3.3%<br>(2.6%–4.2%)    | 0.8%<br>(0.5%–1.3%)    |
| Coatesville, PA                              | 968                   | 19.1%<br>(16.7%–21.8%)              | 54 (53.1–55)                            | 10.2%<br>(8.4%–12.4%)        | 89.8%<br>(87.6%–91.6%) | 63.4%<br>(60.3%–66.5%)                      | 27.6%<br>(24.8%–30.5%) | 6.6%<br>(5.2%–8.4%)    | 2.4%<br>(1.5%–3.6%)    |
| Butler, PA                                   | 559                   | 10.4%<br>(8%–13.3%)                 | 56.2 (54.9–57.6)                        | 9.7%<br>(7.4%–12.5%)         | 90.3%<br>(87.5%–92.6%) | 89.1%<br>(86.1%–91.5%)                      | 5.2%<br>(3.6%–7.5%)    | 5.2%<br>(3.6%–7.5%)    | 0.5%<br>(0.1%–1.7%)    |
| Puerto Rico                                  |                       |                                     |                                         |                              |                        |                                             |                        |                        |                        |
| San Juan, PR                                 | 13,392                | 45.7%<br>(44.9%–46.6%)              | 62.9 (62.6–63.1)                        | 4.5%<br>(4.1%–4.9%)          | 95.5%<br>(95.1%–95.9%) | 3.3%<br>(3%–3.6%)                           | 1.1%<br>(0.9%–1.3%)    | 4.4%<br>(4.1%–4.8%)    | 91.2%<br>(90.8%–91.7%) |
| Rhode Island                                 |                       |                                     |                                         |                              |                        |                                             |                        |                        |                        |
| Providence, RI                               | 4980                  | 11.6%<br>(10.7%–12.5%)              | 61.1 (60.7–61.5)                        | 6.6%<br>(5.9%–7.3%)          | 93.4%<br>(92.7%–94.1%) | 86.8%<br>(85.8%–87.7%)                      | 4.5%<br>(3.9%–5.1%)    | 6.4%<br>(5.7%–7.1%)    | 2.3%<br>(2%–2.8%)      |
| South Carolina                               |                       |                                     |                                         |                              |                        |                                             |                        |                        |                        |
| Charleston, SC                               | 6650                  | 28.3%<br>(27.2%–29.4%)              | 55.7 (55.3–56)                          | 12.6%<br>(11.8%–13.4%)       | 87.4%<br>(86.6%–88.2%) | 51.9%<br>(50.7%–53.1%)                      | 33.8%<br>(32.6%–34.9%) | 12.4%<br>(11.6%–13.2%) | 2%<br>(1.6%–2.3%)      |
| Columbia, SC                                 | 6009                  | 29%<br>(27.8%–30.1%)                | 55.9 (55.5–56.2)                        | 11.4%<br>(10.6%–12.3%)       | 88.6%<br>(87.7%–89.4%) | 49.1%<br>(47.8%–50.3%)                      | 38%<br>(36.8%–39.3%)   | 11.6%<br>(10.9%–12.5%) | 1.2%<br>(1%–1.6%)      |
| South Dakota                                 |                       |                                     |                                         |                              |                        |                                             |                        |                        |                        |
| Black Hills HCS (Fort Meade, SD) (CACHE 5.0) | 3401                  | 31%<br>(29.5%–32.6%)                | 58 (57.5–58.6)                          | 10.6%<br>(9.6%–11.7%)        | 89.4%<br>(88.3%–90.4%) | 81.3%<br>(79.9%–82.6%)                      | 1.1%<br>(0.8%–1.5%)    | 15.9%<br>(14.7%–17.2%) | 1.7%<br>(1.3%–2.2%)    |
| Sioux Falls, SD (CACHE 5.0)                  | 3349                  | 16.8%<br>(15.6%–18.2%)              | 61.1 (60.5–61.6)                        | 7.3%<br>(6.4%–8.2%)          | 92.7%<br>(91.8%–93.6%) | 82.1%<br>(80.7%–83.4%)                      | 1.2%<br>(0.8%–1.6%)    | 16.4%<br>(15.1%–17.7%) | 0.4%<br>(0.2%–0.7%)    |
| Tennessee                                    |                       |                                     |                                         |                              |                        |                                             |                        |                        |                        |
| Mountain Home, TN                            | 9039                  | 29.9%<br>(29%–30.9%)                | 56.6 (56.3–56.9)                        | 5.1%<br>(4.7%–5.6%)          | 94.9%<br>(94.4%–95.3%) | 86.6%<br>(85.9%–87.3%)                      | 3%<br>(2.7%–3.4%)      | 9.7%<br>(9.1%–10.4%)   | 0.6%<br>(0.5%–0.8%)    |

Supplementary Table 1. Continued

| VHA station location                          | Patients included (N) | <i>H pylori</i> positivity (95% CI) | Age, full cohort (y)<br>Median (95% CI) | Sex, % total cohort (95% CI) |                        | Race and ethnicity, % total cohort (95% CI) |                        |                        |                        |
|-----------------------------------------------|-----------------------|-------------------------------------|-----------------------------------------|------------------------------|------------------------|---------------------------------------------|------------------------|------------------------|------------------------|
|                                               |                       |                                     |                                         | Female                       | Male                   | Non-Hispanic white                          | Non-Hispanic black     | Non-Hispanic other     | Hispanic               |
| Tennessee Valley HCS<br>(Nashville, TN)       | 8773                  | 21.4%<br>(20.6%–22.3%)              | 57.3 (57–57.6)                          | 11.7%<br>(11%–12.4%)         | 88.3%<br>(87.6%–89%)   | 75.5%<br>(74.5%–76.4%)                      | 14.2%<br>(13.4%–14.9%) | 8.8%<br>(8.2%–9.4%)    | 1.6%<br>(1.3%–1.9%)    |
| Memphis, TN                                   | 4162                  | 26.1%<br>(24.8%–27.5%)              | 58.5 (58.1–58.9)                        | 10.4%<br>(9.5%–11.4%)        | 89.6%<br>(88.6%–90.5%) | 50.1%<br>(48.6%–51.7%)                      | 40.5%<br>(39%–42%)     | 8.8%<br>(7.9%–9.7%)    | 0.6%<br>(0.4%–0.8%)    |
| Texas                                         |                       |                                     |                                         |                              |                        |                                             |                        |                        |                        |
| Central Texas HCS<br>(Temple, TX)             | 22,676                | 32.9%<br>(32.2%–33.5%)              | 56.3 (56.1–56.5)                        | 14.6%<br>(14.1%–15%)         | 85.4%<br>(85%–85.9%)   | 58%<br>(57.3%–58.6%)                        | 18.2%<br>(17.7%–18.7%) | 14.8%<br>(14.3%–15.3%) | 9%<br>(8.7%–9.4%)      |
| Houston, TX                                   | 17,489                | 28.9%<br>(28.2%–29.6%)              | 57.9 (57.7–58.1)                        | 11.2%<br>(10.7%–11.7%)       | 88.8%<br>(88.3%–89.3%) | 53.5%<br>(52.7%–54.2%)                      | 32.2%<br>(31.5%–32.9%) | 4.1%<br>(3.8%–4.4%)    | 10.3%<br>(9.8%–10.7%)  |
| North Texas HCS (Dallas, TX)                  | 17,036                | 38%<br>(37.3%–38.7%)                | 56.4 (56.2–56.6)                        | 10.4%<br>(9.9%–10.9%)        | 89.6%<br>(89.1%–90.1%) | 57.3%<br>(56.5%–58%)                        | 24.5%<br>(23.9%–25.2%) | 13.1%<br>(12.6%–13.6%) | 5.1%<br>(4.8%–5.5%)    |
| South Texas HCS (San Antonio, TX)             | 16,545                | 26.5%<br>(25.8%–27.2%)              | 57.6 (57.4–57.9)                        | 12.4%<br>(11.9%–12.9%)       | 87.6%<br>(87.1%–88.1%) | 46.3%<br>(45.5%–47%)                        | 9.5%<br>(9.1%–10%)     | 17%<br>(16.4%–17.6%)   | 27.2%<br>(26.5%–27.9%) |
| Amarillo HCS (Amarillo, TX)                   | 6434                  | 37.3%<br>(36.1%–38.5%)              | 60.3 (59.9–60.7)                        | 7.4%<br>(6.8%–8.1%)          | 92.6%<br>(91.9%–93.2%) | 59.7%<br>(58.5%–60.9%)                      | 4.8%<br>(4.3%–5.3%)    | 25.7%<br>(24.7%–26.8%) | 9.8%<br>(9.1%–10.5%)   |
| El Paso, TX                                   | 5333                  | 38.6%<br>(37.3%–39.9%)              | 53.3 (52.9–53.7)                        | 8.5%<br>(7.7%–9.3%)          | 91.5%<br>(90.7%–92.3%) | 26.3%<br>(25.1%–27.5%)                      | 7.8%<br>(7.1%–8.5%)    | 34.1%<br>(32.9%–35.4%) | 31.8%<br>(30.6%–33.1%) |
| Texas Valley Coastal Bend HCS (Harlingen, TX) | 3156                  | 41.2%<br>(39.5%–42.9%)              | 50.8 (50.3–51.4)                        | 8.8%<br>(7.9%–9.9%)          | 91.2%<br>(90.1%–92.1%) | 31.3%<br>(29.7%–33%)                        | 2%<br>(1.5%–2.6%)      | 9.8%<br>(8.8%–10.9%)   | 56.9%<br>(55.1%–58.6%) |
| West Texas HCS (Big Spring, TX)               | 2817                  | 30.1%<br>(28.4%–31.8%)              | 54.4 (53.8–55)                          | 8.4%<br>(7.5%–9.6%)          | 91.6%<br>(90.4%–92.5%) | 58.4%<br>(56.6%–60.3%)                      | 5.4%<br>(4.6%–6.3%)    | 23.7%<br>(22.2%–25.3%) | 12.5%<br>(11.3%–13.7%) |
| Utah                                          |                       |                                     |                                         |                              |                        |                                             |                        |                        |                        |
| Salt Lake City HCS (Salt Lake City, UT)       | 8113                  | 18.2%<br>(17.4%–19.1%)              | 59.7 (59.4–60.1)                        | 6.8%<br>(6.2%–7.3%)          | 93.2%<br>(92.7%–93.8%) | 88.5%<br>(87.8%–89.2%)                      | 1.6%<br>(1.3%–1.9%)    | 4.4%<br>(4%–4.9%)      | 5.4%<br>(5%–6%)        |
| Vermont                                       |                       |                                     |                                         |                              |                        |                                             |                        |                        |                        |
| White River Junction, VT                      | 2637                  | 16.2%<br>(14.8%–17.7%)              | 61.7 (61.1–62.2)                        | 7.5%<br>(6.5%–8.6%)          | 92.5%<br>(91.4%–93.5%) | 91.3%<br>(90.1%–92.3%)                      | 0.6%<br>(0.4%–1%)      | 7.9%<br>(6.9%–9%)      | 0.2%<br>(0.1%–0.5%)    |
| Virginia                                      |                       |                                     |                                         |                              |                        |                                             |                        |                        |                        |
| Richmond, VA                                  | 6107                  | 27.7%<br>(26.5%–28.8%)              | 59.8 (59.5–60.2)                        | 10.2%<br>(9.5%–11%)          | 89.8%<br>(89%–90.5%)   | 49.1%<br>(47.9%–50.4%)                      | 42.7%<br>(41.4%–43.9%) | 6.6%<br>(6%–7.2%)      | 1.6%<br>(1.3%–2%)      |
| Salem, VA                                     | 5378                  | 20.9%<br>(19.8%–22%)                | 60.9 (60.6–61.3)                        | 8%<br>(7.3%–8.7%)            | 92%<br>(91.3%–92.7%)   | 75.3%<br>(74.1%–76.5%)                      | 13.9%<br>(13%–14.8%)   | 10.3%<br>(9.5%–11.2%)  | 0.4%<br>(0.3%–0.7%)    |
| Hampton, VA                                   | 4274                  | 22.6%<br>(21.4%–23.9%)              | 53.7 (53.3–54.2)                        | 17.4%<br>(16.3%–18.6%)       | 82.6%<br>(81.4%–83.7%) | 39%<br>(37.5%–40.4%)                        | 50.4%<br>(48.9%–51.9%) | 7.5%<br>(6.8%–8.4%)    | 3.1%<br>(2.6%–3.7%)    |
| Washington                                    |                       |                                     |                                         |                              |                        |                                             |                        |                        |                        |
| Puget Sound HCS (Seattle, WA) (CACHE 5.0)     | 13,707                | 26.6%<br>(25.8%–27.3%)              | 52.8 (52.6–53.1)                        | 10.7%<br>(10.2%–11.2%)       | 89.3%<br>(88.8%–89.8%) | 66.5%<br>(65.7%–67.3%)                      | 12.7%<br>(12.1%–13.2%) | 17.2%<br>(16.6%–17.9%) | 3.6%<br>(3.3%–3.9%)    |
| Spokane, WA                                   | 3066                  | 8.1%<br>(7.2%–9.2%)                 | 57 (56.5–57.6)                          | 9.4%<br>(8.4%–10.5%)         | 90.6%<br>(89.5%–91.6%) | 81.1%<br>(79.6%–82.4%)                      | 1.5%<br>(1.1%–2%)      | 16.3%<br>(15%–17.7%)   | 1.1%<br>(0.8%–1.6%)    |
| Walla Walla, WA                               | 2538                  | 16.7%<br>(15.3%–18.3%)              | 59.1 (58.5–59.7)                        | 7.2%<br>(6.3%–8.3%)          | 92.8%<br>(91.7%–93.7%) | 83.8%<br>(82.3%–85.2%)                      | 1.6%<br>(1.2%–2.2%)    | 11.7%<br>(10.5%–13%)   | 2.9%<br>(2.3%–3.6%)    |

Supplementary Table 1. Continued

| VHA station location                   | Patients included (N) | <i>H pylori</i> positivity (95% CI) | Age, full cohort (y)<br>Median (95% CI) | Sex, % total cohort (95% CI) |                        | Race and ethnicity, % total cohort (95% CI) |                        |                        |                     |
|----------------------------------------|-----------------------|-------------------------------------|-----------------------------------------|------------------------------|------------------------|---------------------------------------------|------------------------|------------------------|---------------------|
|                                        |                       |                                     |                                         | Female                       | Male                   | Non-Hispanic white                          | Non-Hispanic black     | Non-Hispanic other     | Hispanic            |
| District of Columbia<br>Washington, DC | 4610                  | 25.6%<br>(24.4%–26.9%)              | 56.2 (55.8–56.6)                        | 17.8%<br>(16.7%–18.9%)       | 82.2%<br>(81.1%–83.3%) | 22.5%<br>(21.3%–23.8%)                      | 63.7%<br>(62.3%–65.1%) | 10.5%<br>(9.7%–11.5%)  | 3.3%<br>(2.8%–3.8%) |
| West Virginia<br>Clarksburg, WV        | 5667                  | 25%<br>(23.9%–26.2%)                | 59.3 (58.9–59.6)                        | 6.6%<br>(6%–7.3%)            | 93.4%<br>(92.7%–94%)   | 89.6%<br>(88.7%–90.3%)                      | 1.4%<br>(1.1%–1.8%)    | 8.7%<br>(8%–9.5%)      | 0.3%<br>(0.2%–0.5%) |
| Martinsburg, WV                        | 4822                  | 22.1%<br>(20.9%–23.3%)              | 61 (60.6–61.4)                          | 7.4%<br>(6.7%–8.2%)          | 92.6%<br>(91.8%–93.3%) | 77.5%<br>(76.2%–78.6%)                      | 10.1%<br>(9.3%–11%)    | 11.3%<br>(10.4%–12.2%) | 1.2%<br>(0.9%–1.5%) |
| Beckley, WV                            | 4728                  | 19.8%<br>(18.7%–21%)                | 58.8 (58.4–59.2)                        | 6.5%<br>(5.8%–7.3%)          | 93.5%<br>(92.7%–94.2%) | 85%<br>(83.9%–86%)                          | 5.3%<br>(4.7%–6%)      | 9.4%<br>(8.6%–10.3%)   | 0.3%<br>(0.2%–0.5%) |
| Huntington, WV                         | 3226                  | 25.7%<br>(24.2%–27.2%)              | 59.3 (58.8–59.8)                        | 7.8%<br>(6.9%–8.8%)          | 92.2%<br>(91.2%–93.1%) | 91.4%<br>(90.4%–92.3%)                      | 2.5%<br>(2%–3.1%)      | 5.6%<br>(4.8%–6.4%)    | 0.5%<br>(0.3%–0.9%) |
| Wisconsin<br>Milwaukee, WI             | 8553                  | 23.9%<br>(23%–24.8%)                | 58.2 (57.9–58.5)                        | 8.1%<br>(7.5%–8.7%)          | 91.9%<br>(91.3%–92.5%) | 75.9%<br>(75%–76.8%)                        | 13.8%<br>(13.1%–14.6%) | 7.5%<br>(7%–8.1%)      | 2.7%<br>(2.4%–3.1%) |
| Madison, WI                            | 2228                  | 20.1%<br>(18.5%–21.8%)              | 58.5 (57.9–59.2)                        | 8.4%<br>(7.3%–9.7%)          | 91.6%<br>(90.3%–92.7%) | 78.6%<br>(76.8%–80.3%)                      | 4.4%<br>(3.6%–5.4%)    | 16%<br>(14.5%–17.6%)   | 1%<br>(0.6%–1.5%)   |
| Tomah, WI                              | 1963                  | 17.3%<br>(15.6%–19%)                | 55.6 (54.9–56.3)                        | 10%<br>(8.7%–11.4%)          | 90%<br>(88.6%–91.3%)   | 91.3%<br>(89.9%–92.5%)                      | 1.9%<br>(1.3%–2.6%)    | 5.7%<br>(4.7%–6.8%)    | 1.2%<br>(0.8%–1.8%) |
| Wyoming<br>Cheyenne, WY                | 2280                  | 23.4%<br>(21.7%–25.2%)              | 54.3 (53.7–55)                          | 12.2%<br>(10.9%–13.7%)       | 87.8%<br>(86.3%–89.1%) | 83.9%<br>(82.3%–85.3%)                      | 1.8%<br>(1.3%–2.4%)    | 6.2%<br>(5.3%–7.3%)    | 8.2%<br>(7.1%–9.4%) |
| Sheridan, WY                           | 1956                  | 20.1%<br>(18.4%–22%)                | 58 (57.4–58.7)                          | 7.4%<br>(6.3%–8.7%)          | 92.6%<br>(91.3%–93.7%) | 88.3%<br>(86.8%–89.7%)                      | 0.7%<br>(0.4%–1.2%)    | 8.7%<br>(7.5%–10.1%)   | 2.2%<br>(1.7%–3%)   |

NOTE. Data for Alaska, Hawaii, Philippines, and Puerto Rico are provided in this table, but only the contiguous states are included in the illustrative geographic maps.

**Supplementary Table 2.** State-Specific *H pylori* Positivity According to Race and Ethnicity, Full Cohort, 1999–2018

| State         | Non-Hispanic white        |                                     | Non-Hispanic black        |                                     | Hispanic                  |                                     | Non-Hispanic other        |                                     | Unknown                   |                                     |
|---------------|---------------------------|-------------------------------------|---------------------------|-------------------------------------|---------------------------|-------------------------------------|---------------------------|-------------------------------------|---------------------------|-------------------------------------|
|               | Individuals per state (N) | <i>H pylori</i> positivity (95% CI) | Individuals per state (N) | <i>H pylori</i> positivity (95% CI) | Individuals per state (N) | <i>H pylori</i> positivity (95% CI) | Individuals per state (N) | <i>H pylori</i> positivity (95% CI) | Individuals per state (N) | <i>H pylori</i> positivity (95% CI) |
| Alabama       | 8939                      | 32.5% (31.6%–33.5%)                 | 7862                      | 50.9% (49.8%–52%)                   | 825                       | 39.2% (35.8%–42.6%)                 | 146                       | 35.6% (28%–44%)                     | 1287                      | 45.8% (43.1%–48.6%)                 |
| Alaska        | 1189                      | 20.9% (18.6%–23.3%)                 | 181                       | 39.2% (32.1%–46.8%)                 | 152                       | 32.2% (25%–40.4%)                   | 50                        | 20% (10.5%–34.1%)                   | 130                       | 20.8% (14.4%–29%)                   |
| Arizona       | 15,264                    | 17.8% (17.2%–18.4%)                 | 1376                      | 35% (32.5%–37.6%)                   | 1450                      | 26.8% (24.5%–29.1%)                 | 2391                      | 34.6% (32.7%–36.6%)                 | 1967                      | 27.4% (25.5%–29.4%)                 |
| Arkansas      | 18,694                    | 21.8% (21.2%–22.4%)                 | 2997                      | 39.1% (37.3%–40.8%)                 | 981                       | 26.6% (23.9%–29.5%)                 | 171                       | 37.4% (30.2%–45.2%)                 | 1064                      | 35.6% (32.8%–38.6%)                 |
| California    | 38,033                    | 20.1% (19.7%–20.5%)                 | 10,510                    | 40.8% (39.9%–41.8%)                 | 8115                      | 25.9% (25%–26.9%)                   | 9698                      | 35.9% (34.9%–36.9%)                 | 6770                      | 32.1% (31%–33.2%)                   |
| Colorado      | 8363                      | 18.3% (17.5%–19.2%)                 | 1154                      | 37.1% (34.3%–40%)                   | 632                       | 22.5% (19.3%–26%)                   | 1755                      | 39.1% (36.9%–41.5%)                 | 934                       | 32.5% (29.6%–35.7%)                 |
| Connecticut   | 5651                      | 16.3% (15.3%–17.3%)                 | 1010                      | 34.7% (31.7%–37.7%)                 | 303                       | 24.1% (19.5%–29.4%)                 | 397                       | 30.5% (26%–35.3%)                   | 696                       | 28.7% (25.4%–32.3%)                 |
| Delaware      | 2867                      | 15.6% (14.3%–17%)                   | 1213                      | 32.6% (30%–35.4%)                   | 228                       | 24.6% (19.2%–30.8%)                 | 113                       | 35.4% (26.8%–45%)                   | 358                       | 33.8% (29%–39%)                     |
| Florida       | 51,622                    | 16.2% (15.9%–16.5%)                 | 11,891                    | 38.8% (37.9%–39.7%)                 | 4179                      | 22.9% (21.7%–24.2%)                 | 6380                      | 30.1% (29%–31.3%)                   | 4449                      | 27.6% (26.3%–29%)                   |
| Georgia       | 10,386                    | 22.7% (21.9%–23.5%)                 | 9775                      | 40.6% (39.6%–41.6%)                 | 867                       | 32.8% (29.7%–36%)                   | 351                       | 25.9% (21.5%–30.9%)                 | 1616                      | 36.6% (34.2%–39%)                   |
| Hawaii        | 538                       | 13% (10.3%–16.2%)                   | 136                       | 29.4% (22.1%–37.9%)                 | 637                       | 20.1% (17.1%–23.5%)                 | 89                        | 31.5% (22.3%–42.3%)                 | 45                        | 37.8% (24.2%–53.5%)                 |
| Idaho         | 3611                      | 13.6% (12.5%–14.8%)                 | 45                        | 35.6% (22.3%–51.3%)                 | 491                       | 17.5% (14.3%–21.2%)                 | 119                       | 21.8% (15%–30.5%)                   | 826                       | 14.4% (12.1%–17%)                   |
| Illinois      | 14,032                    | 17.8% (17.2%–18.5%)                 | 7062                      | 42.5% (41.3%–43.6%)                 | 1031                      | 26.5% (23.8%–29.3%)                 | 1306                      | 31.9% (29.4%–34.5%)                 | 1388                      | 33.3% (30.8%–35.8%)                 |
| Indiana       | 11,494                    | 16.2% (15.5%–16.9%)                 | 2013                      | 31.6% (29.6%–33.7%)                 | 524                       | 18.7% (15.5%–22.4%)                 | 158                       | 27.8% (21.2%–35.6%)                 | 1563                      | 24.4% (22.3%–26.7%)                 |
| Kentucky      | 15,642                    | 32.3% (31.5%–33%)                   | 1718                      | 37.5% (35.3%–39.9%)                 | 523                       | 40.2% (35.9%–44.5%)                 | 109                       | 32.1% (23.7%–41.8%)                 | 693                       | 48.2% (44.4%–52%)                   |
| Louisiana     | 9495                      | 22.1% (21.2%–22.9%)                 | 6575                      | 41.4% (40.2%–42.6%)                 | 781                       | 28.8% (25.7%–32.1%)                 | 160                       | 35.6% (28.3%–43.6%)                 | 898                       | 36.7% (33.6%–40%)                   |
| Maine         | 5407                      | 14.2% (13.3%–15.1%)                 | 45                        | 24.4% (13.4%–39.9%)                 | 286                       | 15% (11.2%–19.8%)                   | 35                        | 20% (9.1%–37.5%)                    | 412                       | 23.1% (19.1%–27.5%)                 |
| Maryland      | 2947                      | 22.8% (21.3%–24.4%)                 | 3168                      | 39.7% (38%–41.4%)                   | 263                       | 33.5% (27.9%–39.6%)                 | 85                        | 18.8% (11.5%–29.1%)                 | 409                       | 42.1% (37.2%–47%)                   |
| Massachusetts | 6981                      | 14% (13.2%–14.8%)                   | 723                       | 33.1% (29.7%–36.6%)                 | 395                       | 19.2% (15.5%–23.6%)                 | 314                       | 29.9% (25%–35.4%)                   | 556                       | 26.4% (22.9%–30.4%)                 |
| Michigan      | 17,914                    | 14.8% (14.3%–15.3%)                 | 4621                      | 37.9% (36.5%–39.4%)                 | 1815                      | 20.2% (18.4%–22.1%)                 | 396                       | 28.3% (24%–33%)                     | 1174                      | 27.8% (25.2%–30.4%)                 |
| Minnesota     | 10,985                    | 16.6% (16%–17.4%)                   | 518                       | 45.4% (41%–49.8%)                   | 1229                      | 24.3% (22%–26.8%)                   | 162                       | 25.3% (19%–32.8%)                   | 940                       | 29.1% (26.3%–32.2%)                 |
| Mississippi   | 13,596                    | 32.4% (31.7%–33.2%)                 | 7928                      | 54% (52.9%–55.1%)                   | 1062                      | 40.2% (37.3%–43.2%)                 | 343                       | 40.8% (35.6%–46.2%)                 | 1954                      | 42.8% (40.6%–45%)                   |
| Missouri      | 21,683                    | 24.1% (23.5%–24.6%)                 | 3770                      | 41.2% (39.6%–42.8%)                 | 1069                      | 30.4% (27.7%–33.3%)                 | 367                       | 35.1% (30.3%–40.3%)                 | 1409                      | 36.1% (33.6%–38.6%)                 |
| Montana       | 7169                      | 21.6% (20.6%–22.6%)                 | 36                        | 36.1% (21.3%–53.8%)                 | 651                       | 33.6% (30%–37.4%)                   | 88                        | 33% (23.5%–43.9%)                   | 327                       | 31.2% (26.3%–36.6%)                 |
| Nebraska      | 14,110                    | 16.9% (16.3%–17.5%)                 | 750                       | 32.3% (29%–35.8%)                   | 659                       | 26.4% (23.1%–30%)                   | 258                       | 26% (20.8%–31.8%)                   | 825                       | 35.9% (32.6%–39.3%)                 |
| Nevada        | 9340                      | 16.1% (15.4%–16.9%)                 | 1247                      | 32.3% (29.7%–35%)                   | 1299                      | 20.1% (18%–22.4%)                   | 650                       | 25.2% (22%–28.8%)                   | 1023                      | 30.1% (27.3%–33%)                   |
| New Hampshire | 3711                      | 15.3% (14.1%–16.5%)                 | 55                        | 38.2% (25.7%–52.3%)                 | 254                       | 24% (19%–29.8%)                     | 28                        | 32.1% (16.6%–52.4%)                 | 526                       | 25.5% (21.8%–29.5%)                 |

Supplementary Table 2. Continued

| State          | Non-Hispanic white        |                                     | Non-Hispanic black        |                                     | Hispanic                  |                                     | Non-Hispanic other        |                                     | Unknown                   |                                     |
|----------------|---------------------------|-------------------------------------|---------------------------|-------------------------------------|---------------------------|-------------------------------------|---------------------------|-------------------------------------|---------------------------|-------------------------------------|
|                | Individuals per state (N) | <i>H pylori</i> positivity (95% CI) | Individuals per state (N) | <i>H pylori</i> positivity (95% CI) | Individuals per state (N) | <i>H pylori</i> positivity (95% CI) | Individuals per state (N) | <i>H pylori</i> positivity (95% CI) | Individuals per state (N) | <i>H pylori</i> positivity (95% CI) |
| New Jersey     | 3050                      | 17.3% (16%–18.7%)                   | 1646                      | 31% (28.8%–33.3%)                   | 337                       | 30.9% (26%–36.1%)                   | 461                       | 32.8% (28.5%–37.3%)                 | 190                       | 33.2% (26.6%–40.4%)                 |
| New Mexico     | 2518                      | 9.9% (8.8%–11.1%)                   | 211                       | 20.9% (15.7%–27.1%)                 | 744                       | 16.9% (14.3%–19.9%)                 | 1654                      | 18.3% (16.5%–20.3%)                 | 827                       | 10.2% (8.2%–12.5%)                  |
| New York       | 22,849                    | 18.1% (17.6%–18.7%)                 | 4586                      | 39.7% (38.3%–41.2%)                 | 1350                      | 26.7% (24.4%–29.2%)                 | 1902                      | 37.6% (35.4%–39.8%)                 | 1787                      | 30.3% (28.2%–32.5%)                 |
| North Carolina | 21,424                    | 23.4% (22.8%–24%)                   | 10,438                    | 39.7% (38.8%–40.7%)                 | 1341                      | 33% (30.5%–35.6%)                   | 506                       | 29.6% (25.7%–33.9%)                 | 839                       | 42% (38.6%–45.4%)                   |
| North Dakota   | 3064                      | 13.3% (12.2%–14.6%)                 | 34                        | 35.3% (20.3%–53.5%)                 | 310                       | 24.8% (20.2%–30.1%)                 | 37                        | 29.7% (16.4%–47.2%)                 | 89                        | 38.2% (28.3%–49.2%)                 |
| Ohio           | 22,227                    | 17.1% (16.6%–17.6%)                 | 4845                      | 32.2% (30.9%–33.5%)                 | 1219                      | 21.5% (19.2%–23.9%)                 | 254                       | 24.8% (19.7%–30.7%)                 | 1267                      | 27.2% (24.7%–29.7%)                 |
| Oklahoma       | 11,633                    | 26.1% (25.3%–26.9%)                 | 1795                      | 40.3% (38.1%–42.7%)                 | 1351                      | 31.7% (29.2%–34.2%)                 | 327                       | 33% (28%–38.5%)                     | 1096                      | 41.5% (38.6%–44.5%)                 |
| Oregon         | 11,174                    | 16.7% (16%–17.4%)                   | 343                       | 39.7% (34.5%–45.1%)                 | 1417                      | 21.2% (19.2%–23.5%)                 | 320                       | 25.9% (21.3%–31.2%)                 | 1830                      | 24.5% (22.6%–26.6%)                 |
| Pennsylvania   | 16,682                    | 14.3% (13.8%–14.9%)                 | 4506                      | 31.6% (30.2%–32.9%)                 | 789                       | 23.6% (20.7%–26.7%)                 | 606                       | 29.2% (25.6%–33%)                   | 1165                      | 19.1% (16.9%–21.5%)                 |
| Philippines    | 27                        | 3.7% (0.2%–20.9%)                   | 4                         | 25% (1.3%–78.1%)                    | 57                        | 24.6% (14.5%–38%)                   | 2                         | 0% (NaN–NaN)                        | 3                         | 66.7% (12.5%–98.2%)                 |
| Puerto Rico    | 437                       | 37.1% (32.6%–41.8%)                 | 144                       | 48.6% (40.3%–57%)                   | 196                       | 49.5% (42.3%–56.7%)                 | 12,220                    | 45.7% (44.9%–46.6%)                 | 395                       | 52.7% (47.6%–57.7%)                 |
| Rhode Island   | 4323                      | 10% (9.1%–11%)                      | 223                       | 21.1% (16%–27.1%)                   | 144                       | 14.6% (9.5%–21.7%)                  | 117                       | 29.1% (21.2%–38.3%)                 | 173                       | 24.3% (18.2%–31.5%)                 |
| South Carolina | 6400                      | 20.1% (19.1%–21.1%)                 | 4531                      | 38.8% (37.3%–40.2%)                 | 665                       | 29.2% (25.8%–32.8%)                 | 205                       | 33.2% (26.9%–40.1%)                 | 858                       | 37.2% (34%–40.5%)                   |
| South Dakota   | 5513                      | 21.1% (20%–22.2%)                   | 76                        | 50% (39%–61%)                       | 754                       | 37% (33.6%–40.6%)                   | 72                        | 36.1% (25.4%–48.3%)                 | 335                       | 34.3% (29.3%–39.7%)                 |
| Tennessee      | 16,537                    | 23.6% (23%–24.3%)                   | 3204                      | 33.6% (32%–35.3%)                   | 1104                      | 27.4% (24.9%–30.2%)                 | 216                       | 27.3% (21.6%–33.9%)                 | 913                       | 35.5% (32.4%–38.7%)                 |
| Texas          | 47,793                    | 25.4% (25%–25.8%)                   | 16,442                    | 44.1% (43.4%–44.9%)                 | 7001                      | 36.6% (35.5%–37.7%)                 | 13,680                    | 39.3% (38.5%–40.1%)                 | 6570                      | 40.2% (39%–41.4%)                   |
| Utah           | 71,84                     | 16.7% (15.8%–17.5%)                 | 129                       | 27.9% (20.5%–36.6%)                 | 167                       | 26.3% (20%–33.8%)                   | 441                       | 32.9% (28.6%–37.5%)                 | 192                       | 30.2% (23.9%–37.3%)                 |
| Vermont        | 2407                      | 15.5% (14%–17%)                     | 16                        | 37.5% (16.3%–64.1%)                 | 82                        | 15.9% (9%–26%)                      | 6                         | 66.7% (24.1%–94%)                   | 126                       | 25.4% (18.3%–34.1%)                 |
| Virginia       | 8717                      | 17.4% (16.7%–18.3%)                 | 5506                      | 33.2% (31.9%–34.4%)                 | 591                       | 25% (21.6%–28.8%)                   | 257                       | 26.1% (20.9%–32%)                   | 688                       | 31.7% (28.2%–35.3%)                 |
| Washington     | 13,730                    | 17.5% (16.9%–18.1%)                 | 1821                      | 48.4% (46.1%–50.8%)                 | 1746                      | 27.5% (25.5%–29.7%)                 | 602                       | 34.2% (30.5%–38.2%)                 | 1412                      | 24.4% (22.2%–26.7%)                 |
| Washington, DC | 1039                      | 13.7% (11.7%–15.9%)                 | 2936                      | 29.7% (28.1%–31.4%)                 | 308                       | 25.3% (20.6%–30.6%)                 | 150                       | 26.7% (19.9%–34.6%)                 | 177                       | 27.7% (21.4%–35%)                   |
| West Virginia  | 15,779                    | 21.4% (20.8%–22.1%)                 | 897                       | 29.9% (26.9%–33%)                   | 600                       | 27.8% (24.3%–31.6%)                 | 105                       | 31.4% (22.9%–41.3%)                 | 1062                      | 37.5% (34.6%–40.5%)                 |
| Wisconsin      | 10,039                    | 18.3% (17.5%–19.1%)                 | 1317                      | 46.9% (44.2%–49.7%)                 | 493                       | 25.6% (21.8%–29.7%)                 | 277                       | 36.1% (30.5%–42.1%)                 | 618                       | 23.9% (20.7%–27.6%)                 |
| Wyoming        | 3639                      | 19.9% (18.6%–21.2%)                 | 54                        | 35.2% (23%–49.4%)                   | 182                       | 23.1% (17.3%–30%)                   | 230                       | 43.9% (37.4%–50.6%)                 | 131                       | 30.5% (23%–39.3%)                   |

NOTE. Data for Alaska, Hawaii, Philippines, and Puerto Rico are provided in this table, but only the contiguous states are included in the illustrative geographic maps.

Supplementary Table 3. State-Specific *H. pylori* Positivity by Age Group

| State          | VHA stations per state (n) | Age <60 y       |                                      | Age ≥ 60 y      |                                      |
|----------------|----------------------------|-----------------|--------------------------------------|-----------------|--------------------------------------|
|                |                            | No. of patients | <i>H. pylori</i> positivity (95% CI) | No. of patients | <i>H. pylori</i> positivity (95% CI) |
| Alabama        | 3                          | 11,218          | 40% (39.1%–40.9%)                    | 7841            | 43.2% (42.1%–44.4%)                  |
| Alaska         | 1                          | 1194            | 22.4% (20.1%–24.9%)                  | 508             | 27% (23.2%–31.1%)                    |
| Arizona        | 3                          | 10,867          | 20.2% (19.4%–21%)                    | 11,581          | 23.8% (23%–24.6%)                    |
| Arkansas       | 2                          | 11,574          | 23.9% (23.1%–24.7%)                  | 12,333          | 25.8% (25%–26.6%)                    |
| California     | 8                          | 36,285          | 25.7% (25.2%–26.1%)                  | 36,841          | 28.2% (27.7%–28.6%)                  |
| Colorado       | 2                          | 7297            | 21.7% (20.8%–22.7%)                  | 5541            | 27.2% (26%–28.4%)                    |
| Connecticut    | 1                          | 3382            | 16.8% (15.6%–18.1%)                  | 4675            | 23.5% (22.3%–24.7%)                  |
| Delaware       | 1                          | 2131            | 20.9% (19.2%–22.7%)                  | 2648            | 23.2% (21.6%–24.9%)                  |
| Florida        | 6                          | 37,255          | 22.5% (22.1%–22.9%)                  | 41,266          | 21.1% (20.7%–21.5%)                  |
| Georgia        | 3                          | 12,754          | 32.1% (31.3%–32.9%)                  | 10,241          | 31.2% (30.3%–32.1%)                  |
| Hawaii         | 1                          | 909             | 19.4% (16.9%–22.1%)                  | 536             | 20% (16.7%–23.7%)                    |
| Idaho          | 1                          | 2402            | 11.4% (10.1%–12.7%)                  | 2690            | 17.3% (15.9%–18.8%)                  |
| Illinois       | 4                          | 11,714          | 26.5% (25.8%–27.4%)                  | 13,105          | 27% (26.3%–27.8%)                    |
| Indiana        | 2                          | 7407            | 18.4% (17.5%–19.3%)                  | 8345            | 19.9% (19.1%–20.8%)                  |
| Kentucky       | 2                          | 8827            | 28.9% (28%–29.9%)                    | 9858            | 37.7% (36.8%–38.7%)                  |
| Louisiana      | 3                          | 9096            | 30.2% (29.2%–31.1%)                  | 8813            | 30.5% (29.5%–31.4%)                  |
| Maine          | 1                          | 2921            | 13% (11.8%–14.3%)                    | 3264            | 16.6% (15.4%–18%)                    |
| Maryland       | 1                          | 3464            | 28.8% (27.3%–30.3%)                  | 3408            | 35.5% (33.9%–37.1%)                  |
| Massachusetts  | 3                          | 4057            | 14.8% (13.8%–16%)                    | 4912            | 18.9% (17.8%–20%)                    |
| Michigan       | 5                          | 12,972          | 17.9% (17.2%–18.5%)                  | 12,948          | 22.3% (21.6%–23.1%)                  |
| Minnesota      | 2                          | 5884            | 17.3% (16.3%–18.2%)                  | 7950            | 20.9% (20%–21.8%)                    |
| Mississippi    | 2                          | 13,442          | 40% (39.1%–40.8%)                    | 11,441          | 41.3% (40.4%–42.2%)                  |
| Missouri       | 2                          | 13,560          | 24.1% (23.4%–24.8%)                  | 14,738          | 30.3% (29.6%–31.1%)                  |
| Montana        | 1                          | 4032            | 18.4% (17.2%–19.7%)                  | 4239            | 27.5% (26.2%–28.9%)                  |
| Nebraska       | 1                          | 7263            | 16.2% (15.4%–17.1%)                  | 9339            | 21.2% (20.4%–22.1%)                  |
| Nevada         | 2                          | 6218            | 17.4% (16.5%–18.4%)                  | 7341            | 21.3% (20.3%–22.2%)                  |
| New Hampshire  | 1                          | 2170            | 12.9% (11.5%–14.4%)                  | 2404            | 21.3% (19.7%–23%)                    |
| New Jersey     | 1                          | 2526            | 24.8% (23.1%–26.5%)                  | 3158            | 23.1% (21.7%–24.7%)                  |
| New Mexico     | 1                          | 2831            | 13.9% (12.7%–15.3%)                  | 3123            | 13.2% (12%–14.4%)                    |
| New York       | 5                          | 15,103          | 21.7% (21%–22.4%)                    | 17,371          | 24.8% (24.2%–25.5%)                  |
| North Carolina | 4                          | 17,909          | 28.8% (28.2%–29.5%)                  | 16,639          | 29.7% (29%–30.4%)                    |
| North Dakota   | 1                          | 1400            | 13.7% (12%–15.7%)                    | 2134            | 16.4% (14.9%–18.1%)                  |
| Ohio           | 5                          | 13,888          | 18.9% (18.2%–19.6%)                  | 15,924          | 21.4% (20.8%–22.1%)                  |
| Oklahoma       | 2                          | 8446            | 26.1% (25.2%–27%)                    | 7756            | 32.9% (31.9%–34%)                    |
| Oregon         | 3                          | 8027            | 16.9% (16.1%–17.7%)                  | 7057            | 21% (20.1%–22%)                      |
| Pennsylvania   | 8                          | 12,303          | 15.9% (15.3%–16.6%)                  | 11,445          | 21.3% (20.6%–22.1%)                  |
| Philippines    | 1                          | 57              | 17.5% (9.2%–30.4%)                   | 36              | 22.2% (10.7%–39.6%)                  |
| Puerto Rico    | 1                          | 5114            | 39.9% (38.5%–41.2%)                  | 8278            | 49.4% (48.3%–50.5%)                  |

Supplementary Table 3. Continued

| State          | VHA stations per state (n) | Age <60 y       |                                     | Age ≥ 60 y      |                                     |
|----------------|----------------------------|-----------------|-------------------------------------|-----------------|-------------------------------------|
|                |                            | No. of patients | <i>H pylori</i> positivity (95% CI) | No. of patients | <i>H pylori</i> positivity (95% CI) |
| Rhode Island   | 1                          | 2029            | 10.6% (9.3%–12%)                    | 2951            | 12.3% (11.1%–13.5%)                 |
| South Carolina | 2                          | 7181            | 28.6% (27.6%–29.7%)                 | 5478            | 28.6% (27.4%–29.8%)                 |
| South Dakota   | 2                          | 3068            | 21.3% (19.9%–22.9%)                 | 3682            | 26.2% (24.8%–27.6%)                 |
| Tennessee      | 3                          | 11,406          | 23.8% (23.1%–24.6%)                 | 10,568          | 28% (27.1%–28.8%)                   |
| Texas          | 8                          | 48,744          | 30.8% (30.4%–31.2%)                 | 42,742          | 35% (34.5%–35.4%)                   |
| Utah           | 1                          | 3606            | 15.1% (14%–16.4%)                   | 4507            | 20.7% (19.6%–21.9%)                 |
| Vermont        | 1                          | 1051            | 13.4% (11.4%–15.7%)                 | 1586            | 18% (16.2%–20%)                     |
| Virginia       | 3                          | 7853            | 23.3% (22.4%–24.3%)                 | 7906            | 24.6% (23.7%–25.6%)                 |
| Washington     | 3                          | 11,250          | 21.9% (21.2%–22.7%)                 | 8061            | 22.9% (22%–23.9%)                   |
| Washington, DC | 1                          | 2538            | 25.5% (23.8%–27.2%)                 | 2072            | 25.8% (24%–27.8%)                   |
| West Virginia  | 4                          | 8360            | 21.4% (20.5%–22.3%)                 | 10,083          | 24.4% (23.6%–25.3%)                 |
| Wisconsin      | 3                          | 6182            | 19.9% (18.9%–20.9%)                 | 6562            | 24.4% (23.3%–25.4%)                 |
| Wyoming        | 2                          | 2266            | 17.6% (16.1%–19.3%)                 | 1970            | 26.8% (24.8%–28.8%)                 |

NOTE. Data for Alaska, Hawaii, Philippines, and Puerto Rico are provided in this table, but only the contiguous states are included in the illustrative geographic maps.

**Supplementary Table 4.** *H pylori* Positivity According to Race and Ethnicity for Individuals <60 vs ≥60 Years Old in the Full Analytic Cohort (N = 913,328; 1999–2018) and Separated by Time Interval

| Race and ethnicity | 1999–2018              |                        | 1999–2006              |                        | 2007–2012              |                        | 2013–2018              |                        |
|--------------------|------------------------|------------------------|------------------------|------------------------|------------------------|------------------------|------------------------|------------------------|
|                    | Age <60 years          | Age >60 years          |
| Hispanic           | 34.3%<br>(33.8%–34.8%) | 40.1%<br>(39.5%–40.7%) | 48.2%<br>(47.1%–49.2%) | 59.5%<br>(58.2%–60.7%) | 35.5%<br>(34.7%–36.4%) | 40%<br>(39%–41%)       | 25.2%<br>(24.5%–25.9%) | 28.3%<br>(27.4%–29.2%) |
| Non-Hispanic black | 40.7%<br>(40.3%–41.0%) | 39.5%<br>(39.1%–39.9%) | 51.7%<br>(51.1%–52.3%) | 51.5%<br>(50.6%–52.4%) | 40.5%<br>(39.9%–41%)   | 40.5%<br>(39.9%–41.2%) | 31.4%<br>(30.9%–31.9%) | 33%<br>(32.5%–33.6%)   |
| Non-Hispanic other | 26.6%<br>(26.1%–27.1%) | 28.8%<br>(28.3%–29.4%) | 34.8%<br>(33.8%–35.7%) | 39.6%<br>(38.6%–40.7%) | 25.7%<br>(24.9%–26.6%) | 26.6%<br>(25.7%–27.5%) | 19.3%<br>(18.5%–20.1%) | 20.2%<br>(19.4%–21.1%) |
| Non-Hispanic white | 17.2%<br>(17.1%–17.4%) | 22.5%<br>(22.4%–22.7%) | 25.5%<br>(25.2%–25.8%) | 35.4%<br>(35%–35.7%)   | 15%<br>(14.8%–15.2%)   | 20.7%<br>(20.4%–20.9%) | 11.2%<br>(11%–11.4%)   | 14.9%<br>(14.7%–15.1%) |



Supplementary Table 5. State-Specific *H pylori* Positivity by Sex

| State          | VHA stations per state (n) | Male            |                                     | Female          |                                     |
|----------------|----------------------------|-----------------|-------------------------------------|-----------------|-------------------------------------|
|                |                            | No. of patients | <i>H pylori</i> positivity (95% CI) | No. of patients | <i>H pylori</i> positivity (95% CI) |
| Alabama        | 3                          | 16,887          | 42.2% (41.5%–42.9%)                 | 2172            | 34.4% (32.4%–36.5%)                 |
| Alaska         | 1                          | 1486            | 24% (21.8%–26.2%)                   | 216             | 22.7% (17.4%–29%)                   |
| Arizona        | 3                          | 20,097          | 22.7% (22.2%–23.3%)                 | 2351            | 16.2% (14.8%–17.8%)                 |
| Arkansas       | 2                          | 21,990          | 25.4% (24.8%–26%)                   | 1917            | 18.7% (17%–20.6%)                   |
| California     | 8                          | 65,798          | 27.6% (27.2%–27.9%)                 | 7328            | 21% (20.1%–22%)                     |
| Colorado       | 2                          | 11,459          | 25% (24.2%–25.8%)                   | 1379            | 16.5% (14.6%–18.5%)                 |
| Connecticut    | 1                          | 7488            | 21.1% (20.2%–22%)                   | 569             | 14.9% (12.2%–18.2%)                 |
| Delaware       | 1                          | 4348            | 22.3% (21.1%–23.6%)                 | 431             | 20.6% (17%–24.8%)                   |
| Florida        | 6                          | 69,517          | 22% (21.7%–22.3%)                   | 9004            | 19.8% (19%–20.7%)                   |
| Georgia        | 3                          | 20,171          | 32.6% (32%–33.2%)                   | 2824            | 25.4% (23.8%–27%)                   |
| Hawaii         | 1                          | 1297            | 19.8% (17.7%–22.1%)                 | 148             | 17.6% (12%–24.9%)                   |
| Idaho          | 1                          | 4664            | 14.9% (13.9%–16%)                   | 428             | 9.8% (7.2%–13.1%)                   |
| Illinois       | 4                          | 22,130          | 27.4% (26.8%–28%)                   | 2689            | 21.9% (20.3%–23.5%)                 |
| Indiana        | 2                          | 14,385          | 19.5% (18.8%–20.1%)                 | 1367            | 16.4% (14.5%–18.5%)                 |
| Kentucky       | 2                          | 17,340          | 34.5% (33.8%–35.2%)                 | 1345            | 22% (19.8%–24.3%)                   |
| Louisiana      | 3                          | 16,067          | 31.2% (30.5%–31.9%)                 | 1842            | 22.5% (20.7%–24.5%)                 |
| Maine          | 1                          | 5724            | 15.4% (14.4%–16.3%)                 | 461             | 9.3% (6.9%–12.4%)                   |
| Maryland       | 1                          | 6047            | 33.2% (32%–34.4%)                   | 825             | 24.5% (21.6%–27.6%)                 |
| Massachusetts  | 3                          | 8257            | 17.3% (16.5%–18.1%)                 | 712             | 14.6% (12.1%–17.5%)                 |
| Michigan       | 5                          | 24,045          | 20.6% (20.1%–21.1%)                 | 1875            | 13.4% (11.9%–15%)                   |
| Minnesota      | 2                          | 12,891          | 19.9% (19.2%–20.6%)                 | 943             | 12.3% (10.3%–14.6%)                 |
| Mississippi    | 2                          | 22,326          | 41.5% (40.8%–42.1%)                 | 2557            | 32.6% (30.8%–34.4%)                 |
| Missouri       | 2                          | 25,639          | 28% (27.5%–28.6%)                   | 2659            | 20.5% (19%–22.1%)                   |
| Montana        | 1                          | 7582            | 23.6% (22.7%–24.6%)                 | 689             | 17.1% (14.4%–20.2%)                 |
| Nebraska       | 1                          | 15,340          | 19.6% (18.9%–20.2%)                 | 1262            | 13% (11.2%–15%)                     |
| Nevada         | 2                          | 12,310          | 20.1% (19.4%–20.9%)                 | 1249            | 13.3% (11.5%–15.3%)                 |
| New Hampshire  | 1                          | 4197            | 17.7% (16.5%–18.9%)                 | 377             | 13.3% (10.1%–17.2%)                 |
| New Jersey     | 1                          | 5198            | 23.9% (22.8%–25.1%)                 | 486             | 23.5% (19.8%–27.5%)                 |
| New Mexico     | 1                          | 5135            | 14.1% (13.1%–15.1%)                 | 819             | 10.1% (8.2%–12.5%)                  |
| New York       | 5                          | 29,245          | 23.7% (23.2%–24.2%)                 | 3229            | 20.6% (19.3%–22.1%)                 |
| North Carolina | 4                          | 30,797          | 29.9% (29.4%–30.4%)                 | 3751            | 24% (22.6%–25.4%)                   |
| North Dakota   | 1                          | 3296            | 15.6% (14.4%–16.9%)                 | 238             | 12.2% (8.4%–17.2%)                  |
| Ohio           | 5                          | 27,419          | 20.7% (20.2%–21.2%)                 | 2393            | 14.9% (13.5%–16.4%)                 |
| Oklahoma       | 2                          | 14,489          | 30.5% (29.7%–31.3%)                 | 1713            | 19.7% (17.8%–21.7%)                 |
| Oregon         | 3                          | 13,673          | 19.4% (18.8%–20.1%)                 | 1411            | 12.8% (11.1%–14.6%)                 |
| Pennsylvania   | 8                          | 21,550          | 18.7% (18.2%–19.3%)                 | 2198            | 16.3% (14.8%–18%)                   |
| Philippines    | 1                          | 90              | 17.8% (10.8%–27.6%)                 | 3               | 66.7% (12.5%–98.2%)                 |
| Puerto Rico    | 1                          | 12,791          | 46.4% (45.5%–47.2%)                 | 601             | 32.8% (29.1%–36.7%)                 |

Supplementary Table 5. Continued

| State          | VHA stations per state (n) | Male            |                                     | Female          |                                     |
|----------------|----------------------------|-----------------|-------------------------------------|-----------------|-------------------------------------|
|                |                            | No. of patients | <i>H pylori</i> positivity (95% CI) | No. of patients | <i>H pylori</i> positivity (95% CI) |
| Rhode Island   | 1                          | 4652            | 11.7% (10.8%–12.7%)                 | 328             | 9.8% (6.9%–13.6%)                   |
| South Carolina | 2                          | 11,136          | 29.5% (28.6%–30.3%)                 | 1523            | 22.5% (20.5%–24.7%)                 |
| South Dakota   | 2                          | 6146            | 24.6% (23.5%–25.7%)                 | 604             | 18.2% (15.3%–21.6%)                 |
| Tennessee      | 3                          | 20,055          | 26.6% (26%–27.2%)                   | 1919            | 18.1% (16.4%–19.9%)                 |
| Texas          | 8                          | 80,960          | 33.7% (33.4%–34%)                   | 10,526          | 25.6% (24.8%–26.5%)                 |
| Utah           | 1                          | 7565            | 18.7% (17.8%–19.6%)                 | 548             | 11.9% (9.3%–14.9%)                  |
| Vermont        | 1                          | 2440            | 16.6% (15.2%–18.1%)                 | 197             | 11.2% (7.3%–16.6%)                  |
| Virginia       | 3                          | 13,961          | 24.8% (24.1%–25.5%)                 | 1798            | 17.6% (15.9%–19.5%)                 |
| Washington     | 3                          | 17,375          | 22.7% (22.1%–23.4%)                 | 1936            | 18.8% (17%–20.6%)                   |
| Washington, DC | 1                          | 3791            | 26.3% (24.9%–27.7%)                 | 819             | 22.6% (19.8%–25.6%)                 |
| West Virginia  | 4                          | 17,150          | 23.7% (23%–24.3%)                   | 1293            | 14.5% (12.6%–16.5%)                 |
| Wisconsin      | 3                          | 11,671          | 22.6% (21.8%–23.3%)                 | 1073            | 17.9% (15.7%–20.3%)                 |
| Wyoming        | 2                          | 3812            | 22.7% (21.4%–24%)                   | 424             | 14.6% (11.5%–18.4%)                 |

NOTE. Data for Alaska, Hawaii, Philippines, and Puerto Rico are provided in this table, but only the contiguous states are included in the illustrative geographic maps.

Supplementary Table 6. Percent Variance of *H pylori* Positivity Based on Demographic Variables

| Demographic variable | Percent variance (%) |           |           |           |
|----------------------|----------------------|-----------|-----------|-----------|
|                      | 1999–2018            | 1999–2006 | 2007–2012 | 2013–2018 |
| Model                | 4.67                 | 4.92      | 5.35      | 4.23      |
| Age                  | 0.68                 | 0.90      | 0.45      | 0.18      |
| Sex                  | 0.16                 | 0.24      | 0.08      | 0.03      |
| Race or ethnicity    | 3.51                 | 3.05      | 4.53      | 3.84      |
| US Census Region     | 0.71                 | 1.30      | 0.67      | 0.35      |

NOTE. The percent variances displayed are the independent effects. Thus, the sum of the percentages for the 4 explanatory demographic factors will not total that of the full model because of correlation between the variables.
